# Supplementary material for: High-resolution maps of Swiss apiaries and their applicability to study spatial distribution of bacterial honey bee brood diseases
Source: PeerJ. 2019 Jan 31;7:e6393. doi: 10.7717/peerj.6393 (PMC6360077; doi:10.7717/peerj.6393)
Supplement: Supplemental Information 2 [file peerj-07-6393-s002.xlsx]

## Sheet: raw_all_1991-2016
date of diagnosis	canton	district	municipality	disease	no. of infected cases	no. of dead cases
2006-05-26	Aargau	Aarau	Densbüren	EFB	5	0
2008-05-04	Aargau	Aarau	Küttigen	EFB	1	0
2008-05-13	Aargau	Aarau	Küttigen	EFB	1	0
2008-05-19	Aargau	Aarau	Küttigen	EFB	1	0
2008-07-21	Aargau	Aarau	Buchs (AG)	AFB	1	0
2008-07-23	Aargau	Aarau	Buchs (AG)	AFB	1	0
2008-08-05	Aargau	Aarau	Küttigen	EFB	2	2
2008-08-11	Aargau	Aarau	Erlinsbach	AFB	1	1
2008-08-19	Aargau	Aarau	Erlinsbach	AFB	2	2
2010-04-13	Aargau	Aarau	Küttigen	EFB	4	4
2010-05-06	Aargau	Aarau	Buchs (AG)	EFB	2	2
2010-05-27	Aargau	Aarau	Erlinsbach	EFB	1	1
2011-04-29	Aargau	Aarau	Erlinsbach	EFB	2	0
2012-03-28	Aargau	Aarau	Küttigen	EFB	3	3
2013-04-25	Aargau	Aarau	Unterentfelden	EFB	1	1
2013-05-06	Aargau	Aarau	Oberentfelden	EFB	1	2
2013-05-23	Aargau	Aarau	Küttigen	EFB	1	1
2013-07-26	Aargau	Aarau	Unterentfelden	EFB	1	2
2015-06-17	Aargau	Aarau	Oberentfelden	EFB	4	4
2016-04-15	Aargau	Aarau	Oberentfelden	EFB	1	1
2016-05-27	Aargau	Aarau	Gränichen	AFB	1	0
2016-07-07	Aargau	Aarau	Oberentfelden	EFB	1	1
2016-07-26	Aargau	Aarau	Muhen	EFB	1	1
1993-06-15	Bern	Aarberg	Bargen (BE)	AFB	0	0
1997-07-15	Bern	Aarberg	Lyss	EFB	1	0
1999-10-16	Bern	Aarberg	Kappelen	EFB	0	0
2000-06-27	Bern	Aarberg	Rapperswil (BE)	AFB	1	0
2003-05-26	Bern	Aarberg	Grossaffoltern	EFB	2	0
2004-05-08	Bern	Aarberg	Seedorf (BE)	EFB	5	0
2004-05-13	Bern	Aarberg	Schüpfen	EFB	3	0
2004-06-02	Bern	Aarberg	Seedorf (BE)	EFB	19	0
2004-06-02	Bern	Aarberg	Aarberg	EFB	3	0
2004-06-04	Bern	Aarberg	Seedorf (BE)	EFB	17	0
2004-07-07	Bern	Aarberg	Schüpfen	AFB	2	0
2005-05-24	Bern	Aarberg	Schüpfen	EFB	2	0
2005-06-02	Bern	Aarberg	Meikirch	EFB	1	0
2005-06-21	Bern	Aarberg	Meikirch	EFB	1	0
2005-07-27	Bern	Aarberg	Meikirch	AFB	2	0
2005-09-10	Bern	Aarberg	Aarberg	EFB	1	0
2006-05-09	Bern	Aarberg	Grossaffoltern	EFB	1	0
2006-05-12	Bern	Aarberg	Meikirch	EFB	0	0
2006-05-19	Bern	Aarberg	Rapperswil (BE)	EFB	1	0
2006-06-10	Bern	Aarberg	Grossaffoltern	EFB	2	0
2006-06-14	Bern	Aarberg	Schüpfen	EFB	8	0
2007-03-31	Bern	Aarberg	Meikirch	EFB	15	0
2007-08-25	Bern	Aarberg	Grossaffoltern	AFB	1	0
2007-09-08	Bern	Aarberg	Rapperswil (BE)	AFB	4	0
2008-03-30	Bern	Aarberg	Grossaffoltern	AFB	13	0
2008-04-12	Bern	Aarberg	Grossaffoltern	EFB	6	0
2008-04-19	Bern	Aarberg	Rapperswil (BE)	EFB	8	0
2008-05-16	Bern	Aarberg	Seedorf (BE)	EFB	3	0
2008-05-17	Bern	Aarberg	Schüpfen	EFB	6	0
2008-06-14	Bern	Aarberg	Meikirch	EFB	2	0
2009-05-01	Bern	Aarberg	Kallnach	EFB	1	0
2009-06-10	Bern	Aarberg	Grossaffoltern	EFB	1	0
2009-06-10	Bern	Aarberg	Kallnach	EFB	1	0
2009-06-10	Bern	Aarberg	Lyss	EFB	1	0
2009-06-23	Bern	Aarberg	Lyss	EFB	1	0
2009-06-23	Bern	Aarberg	Lyss	EFB	1	0
2009-06-23	Bern	Aarberg	Lyss	EFB	1	0
2009-07-07	Bern	Aarberg	Lyss	EFB	1	0
2009-08-20	Bern	Aarberg	Rapperswil (BE)	EFB	1	0
2010-04-15	Bern	Aarberg	Rapperswil (BE)	EFB	1	0
2010-04-28	Bern	Aarberg	Meikirch	EFB	1	0
2010-05-14	Bern	Aarberg	Kallnach	EFB	1	0
2010-05-22	Bern	Aarberg	Lyss	EFB	1	0
2010-05-25	Bern	Aarberg	Kallnach	EFB	1	0
2010-05-26	Bern	Aarberg	Meikirch	EFB	1	0
2011-05-15	Bern	Aarberg	Schüpfen	EFB	1	0
2011-06-14	Bern	Aarberg	Radelfingen	EFB	1	0
2011-08-03	Bern	Aarberg	Radelfingen	EFB	1	0
2012-04-02	Bern	Aarberg	Schüpfen	EFB	1	0
2012-04-02	Bern	Aarberg	Schüpfen	EFB	1	0
2012-04-30	Bern	Aarberg	Kallnach	EFB	1	0
2012-05-22	Bern	Aarberg	Schüpfen	EFB	1	0
1994-08-15	Bern	Aarwangen		AFB	0	0
2002-07-07	Bern	Aarwangen	Thunstetten	AFB	1	0
2002-08-24	Bern	Aarwangen	Leimiswil	EFB	4	0
2003-04-24	Bern	Aarwangen	Leimiswil	AFB	1	0
2003-05-21	Bern	Aarwangen	Auswil	EFB	2	0
2004-04-04	Bern	Aarwangen	Melchnau	EFB	2	0
2004-04-26	Bern	Aarwangen	Thunstetten	EFB	1	0
2005-05-24	Bern	Aarwangen	Untersteckholz	EFB	4	0
2005-05-26	Bern	Aarwangen	Bleienbach	EFB	1	0
2005-06-06	Bern	Aarwangen	Bleienbach	AFB	6	0
2006-06-13	Bern	Aarwangen	Auswil	EFB	10	0
2006-06-13	Bern	Aarwangen	Auswil	EFB	2	0
2006-06-14	Bern	Aarwangen	Gondiswil	EFB	1	0
2006-06-19	Bern	Aarwangen	Auswil	EFB	1	0
2006-06-19	Bern	Aarwangen	Auswil	EFB	1	0
2006-06-23	Bern	Aarwangen	Madiswil	EFB	1	0
2006-06-30	Bern	Aarwangen	Reisiswil	EFB	3	0
2006-07-04	Bern	Aarwangen	Gondiswil	EFB	1	0
2006-07-22	Bern	Aarwangen	Auswil	EFB	3	0
2006-08-11	Bern	Aarwangen	Leimiswil	EFB	2	0
2007-05-02	Bern	Aarwangen	Bannwil	EFB	1	0
2007-05-16	Bern	Aarwangen	Reisiswil	EFB	1	0
2007-05-18	Bern	Aarwangen	Madiswil	EFB	2	0
2007-05-18	Bern	Aarwangen	Gondiswil	EFB	4	0
2007-05-29	Bern	Aarwangen	Thunstetten	EFB	3	0
2007-06-01	Bern	Aarwangen	Langenthal	EFB	1	0
2007-06-06	Bern	Aarwangen	Langenthal	EFB	1	0
2007-06-08	Bern	Aarwangen	Reisiswil	EFB	1	0
2007-06-12	Bern	Aarwangen	Madiswil	EFB	1	0
2007-06-15	Bern	Aarwangen	Madiswil	EFB	2	0
2007-06-23	Bern	Aarwangen	Madiswil	EFB	1	0
2007-07-11	Bern	Aarwangen	Madiswil	EFB	1	0
2007-08-13	Bern	Aarwangen	Aarwangen	EFB	1	0
2007-08-16	Bern	Aarwangen	Aarwangen	EFB	2	0
2007-12-21	Bern	Aarwangen	Leimiswil	EFB	8	0
2008-05-05	Bern	Aarwangen	Rohrbachgraben	EFB	13	0
2008-05-07	Bern	Aarwangen	Rohrbachgraben	EFB	3	0
2008-05-13	Bern	Aarwangen	Rohrbachgraben	EFB	1	0
2008-05-13	Bern	Aarwangen	Obersteckholz	EFB	6	0
2008-05-17	Bern	Aarwangen	Rohrbachgraben	EFB	2	0
2008-05-20	Bern	Aarwangen	Rohrbachgraben	EFB	7	0
2008-06-13	Bern	Aarwangen	Rohrbachgraben	EFB	2	0
2008-08-14	Bern	Aarwangen	Rohrbachgraben	EFB	9	0
2009-04-15	Bern	Aarwangen	Rohrbachgraben	EFB	1	0
2009-04-16	Bern	Aarwangen	Langenthal	EFB	1	0
2009-05-01	Bern	Aarwangen	Auswil	EFB	1	0
2009-05-01	Bern	Aarwangen	Leimiswil	EFB	1	0
2009-05-13	Bern	Aarwangen	Auswil	EFB	1	0
2009-05-13	Bern	Aarwangen	Melchnau	EFB	1	0
2009-05-13	Bern	Aarwangen	Melchnau	EFB	1	0
2009-05-13	Bern	Aarwangen	Roggwil (BE)	EFB	1	0
2009-05-13	Bern	Aarwangen	Rohrbach	EFB	1	0
2009-05-19	Bern	Aarwangen	Rohrbach	EFB	1	0
2009-05-19	Bern	Aarwangen	Untersteckholz	EFB	1	0
2009-05-19	Bern	Aarwangen	Reisiswil	EFB	1	0
2009-05-26	Bern	Aarwangen	Leimiswil	EFB	1	0
2009-05-26	Bern	Aarwangen	Rohrbachgraben	EFB	1	0
2009-05-26	Bern	Aarwangen	Untersteckholz	EFB	1	0
2009-05-27	Bern	Aarwangen	Kleindietwil	EFB	1	0
2009-05-28	Bern	Aarwangen	Langenthal	EFB	1	0
2009-05-28	Bern	Aarwangen	Aarwangen	EFB	1	0
2009-05-28	Bern	Aarwangen	Melchnau	EFB	1	0
2009-05-28	Bern	Aarwangen	Rohrbachgraben	EFB	1	0
2009-06-09	Bern	Aarwangen	Bannwil	EFB	1	0
2009-06-17	Bern	Aarwangen	Untersteckholz	EFB	1	0
2009-06-17	Bern	Aarwangen	Kleindietwil	EFB	1	0
2009-06-17	Bern	Aarwangen	Madiswil	EFB	1	0
2009-06-17	Bern	Aarwangen	Rohrbachgraben	EFB	1	0
2009-06-24	Bern	Aarwangen	Gondiswil	EFB	1	0
2009-06-24	Bern	Aarwangen	Gondiswil	EFB	1	0
2009-06-24	Bern	Aarwangen	Rohrbach	EFB	1	0
2009-07-02	Bern	Aarwangen	Bannwil	EFB	1	0
2009-07-07	Bern	Aarwangen	Kleindietwil	EFB	1	0
2009-07-07	Bern	Aarwangen	Rohrbachgraben	EFB	1	0
2009-07-07	Bern	Aarwangen	Madiswil	EFB	1	0
2009-07-10	Bern	Aarwangen	Bannwil	EFB	1	0
2009-07-14	Bern	Aarwangen	Gondiswil	EFB	1	0
2009-07-20	Bern	Aarwangen	Rohrbachgraben	EFB	1	0
2009-07-20	Bern	Aarwangen	Gondiswil	EFB	1	0
2009-07-20	Bern	Aarwangen	Kleindietwil	EFB	1	0
2009-07-23	Bern	Aarwangen	Rohrbachgraben	EFB	1	0
2009-07-28	Bern	Aarwangen	Thunstetten	EFB	1	0
2009-07-31	Bern	Aarwangen	Bannwil	EFB	1	0
2009-08-04	Bern	Aarwangen	Bannwil	EFB	1	0
2009-08-06	Bern	Aarwangen	Rohrbachgraben	EFB	1	0
2009-08-12	Bern	Aarwangen	Bannwil	EFB	1	0
2009-08-26	Bern	Aarwangen	Reisiswil	EFB	1	0
2009-08-26	Bern	Aarwangen	Langenthal	EFB	1	0
2009-08-26	Bern	Aarwangen	Aarwangen	EFB	1	0
2009-08-26	Bern	Aarwangen	Aarwangen	EFB	1	0
2009-09-02	Bern	Aarwangen	Thunstetten	EFB	1	0
2009-09-04	Bern	Aarwangen	Aarwangen	EFB	1	0
2009-09-15	Bern	Aarwangen	Madiswil	EFB	1	0
2009-09-24	Bern	Aarwangen	Madiswil	EFB	1	0
2010-04-08	Bern	Aarwangen	Rohrbachgraben	EFB	1	0
2010-04-08	Bern	Aarwangen	Rohrbach	EFB	1	0
2010-04-08	Bern	Aarwangen	Rohrbach	EFB	1	0
2010-04-23	Bern	Aarwangen	Melchnau	EFB	1	0
2010-05-03	Bern	Aarwangen	Bleienbach	EFB	1	0
2010-05-03	Bern	Aarwangen	Langenthal	EFB	1	0
2010-05-05	Bern	Aarwangen	Leimiswil	EFB	1	0
2010-05-05	Bern	Aarwangen	Madiswil	EFB	1	0
2010-05-10	Bern	Aarwangen	Bannwil	EFB	1	0
2010-05-14	Bern	Aarwangen	Busswil bei Melchnau	EFB	1	0
2010-05-17	Bern	Aarwangen	Gondiswil	EFB	1	0
2010-05-18	Bern	Aarwangen	Bannwil	EFB	1	0
2010-05-19	Bern	Aarwangen	Auswil	EFB	1	0
2010-05-25	Bern	Aarwangen	Busswil bei Melchnau	EFB	1	0
2010-05-25	Bern	Aarwangen	Busswil bei Melchnau	EFB	1	0
2010-05-27	Bern	Aarwangen	Leimiswil	EFB	1	0
2010-05-27	Bern	Aarwangen	Ursenbach	EFB	1	0
2010-06-03	Bern	Aarwangen	Langenthal	EFB	1	0
2010-07-09	Bern	Aarwangen	Ursenbach	EFB	1	0
2010-07-22	Bern	Aarwangen	Ursenbach	EFB	1	0
2011-04-05	Bern	Aarwangen	Rohrbachgraben	EFB	1	0
2011-04-13	Bern	Aarwangen	Madiswil	EFB	1	0
2011-04-29	Bern	Aarwangen	Gondiswil	EFB	1	0
2011-05-23	Bern	Aarwangen	Rohrbachgraben	EFB	1	0
2011-06-08	Bern	Aarwangen	Oeschenbach	EFB	1	0
2011-07-22	Bern	Aarwangen	Thunstetten	AFB	1	0
2012-05-03	Bern	Aarwangen	Melchnau	EFB	1	0
2014-07-28	Bern	Aarwangen	Roggwil (BE)	EFB	1	0
2005-05-25	Appenzell Innerrhoden	Aeusserer Landesteil	Oberegg	EFB	3	0
2005-06-01	Appenzell Innerrhoden	Aeusserer Landesteil	Oberegg	EFB	0	0
2007-05-12	Appenzell Innerrhoden	Aeusserer Landesteil	Oberegg	EFB	3	3
1993-05-15	Zürich	Affoltern		EFB	0	0
1993-06-15	Zürich	Affoltern		EFB	0	0
1993-06-15	Zürich	Affoltern		EFB	0	0
1993-06-15	Zürich	Affoltern		EFB	0	0
1995-03-15	Zürich	Affoltern		Varroa destructor	0	0
1996-07-15	Zürich	Affoltern	Wettswil am Albis	AFB	0	0
1998-04-10	Zürich	Affoltern	Kappel am Albis	Varroa destructor	0	0
1998-04-17	Zürich	Affoltern	Mettmenstetten	Varroa destructor	0	0
1999-07-05	Zürich	Affoltern	Aeugst am Albis	Varroa destructor	1	0
2005-05-24	Zürich	Affoltern	Mettmenstetten	EFB	1	0
2005-09-01	Zürich	Affoltern	Wettswil am Albis	AFB	2	0
2005-09-06	Zürich	Affoltern	Stallikon	AFB	1	0
2005-09-06	Zürich	Affoltern	Wettswil am Albis	AFB	1	0
2005-09-06	Zürich	Affoltern	Stallikon	EFB	1	0
2008-07-16	Zürich	Affoltern	Mettmenstetten	AFB	1	0
2009-05-05	Zürich	Affoltern	Obfelden	EFB	8	0
2009-05-25	Zürich	Affoltern	Kappel am Albis	EFB	1	0
2010-05-01	Zürich	Affoltern	Mettmenstetten	EFB	1	0
2011-04-05	Zürich	Affoltern	Wettswil am Albis	EFB	1	0
2011-06-04	Zürich	Affoltern	Kappel am Albis	EFB	1	0
2012-04-24	Zürich	Affoltern	Mettmenstetten	EFB	1	0
2012-05-25	Zürich	Affoltern	Mettmenstetten	EFB	1	0
2012-06-12	Zürich	Affoltern	Mettmenstetten	EFB	1	0
2013-07-01	Zürich	Affoltern	Hausen am Albis	EFB	1	0
2016-06-28	Zürich	Affoltern	Knonau	EFB	1	0
2016-08-10	Zürich	Affoltern	Kappel am Albis	Varroa destructor	1	0
1997-07-11	Waadt	Aigle	Bex	AFB	1	1
2014-01-01	Waadt	Aigle	Bex	AFB	1	1
2015-06-29	Waadt	Aigle	Leysin	AFB	2	0
2015-07-10	Waadt	Aigle	Ormont-Dessus	AFB	1	1
1992-06-15	Waadt	Aigle (bis 2006)		EFB	0	0
1992-06-15	Waadt	Aigle (bis 2006)		EFB	0	0
1993-03-15	Waadt	Aigle (bis 2006)	Bex (bis 2006)	Varroa destructor	0	0
1993-03-15	Waadt	Aigle (bis 2006)		Varroa destructor	0	0
1993-06-15	Waadt	Aigle (bis 2006)		EFB	0	0
1993-06-15	Waadt	Aigle (bis 2006)		EFB	0	0
1994-03-15	Waadt	Aigle (bis 2006)		Varroa destructor	3	0
1994-05-15	Waadt	Aigle (bis 2006)	Ormont-Dessus	EFB	0	0
1994-06-15	Waadt	Aigle (bis 2006)	Roche (VD)	EFB	15	0
1994-07-15	Waadt	Aigle (bis 2006)		EFB	1	0
1995-04-15	Waadt	Aigle (bis 2006)	Ollon	Varroa destructor	0	0
1996-05-20	Waadt	Aigle (bis 2006)		EFB	1	1
1996-07-04	Waadt	Aigle (bis 2006)		EFB	1	1
1997-06-26	Waadt	Aigle (bis 2006)	Bex (bis 2006)	AFB	1	1
1998-04-03	Waadt	Aigle (bis 2006)	Aigle	AFB	2	0
1999-09-07	Waadt	Aigle (bis 2006)	Leysin	Varroa destructor	0	0
1999-09-08	Waadt	Aigle (bis 2006)	Bex (bis 2006)	Varroa destructor	0	0
2000-11-07	Waadt	Aigle (bis 2006)	Villeneuve (VD)	Varroa destructor	1	0
2001-05-15	Waadt	Aigle (bis 2006)	Bex (bis 2006)	EFB	1	0
2002-06-10	Waadt	Aigle (bis 2006)	Ormont-Dessous	AFB	1	1
2004-06-29	Waadt	Aigle (bis 2006)	Bex (bis 2006)	EFB	1	0
2004-07-08	Waadt	Aigle (bis 2006)	Bex (bis 2006)	EFB	1	0
2010-03-09	Waadt	Aigle (bis 2006)	Noville	AFB	1	0
2011-10-17	Graubünden	Albula	Salouf	EFB	14	18
2011-10-17	Graubünden	Albula	Salouf	Varroa destructor	14	18
2014-05-06	Graubünden	Albula	Alvaschein	EFB	3	0
2014-05-06	Graubünden	Albula	Filisur	EFB	7	0
2014-05-06	Graubünden	Albula	Filisur	EFB	3	0
2014-10-07	Graubünden	Albula	Bergün/Bravuogn	EFB	3	4
2016-04-20	Graubünden	Albula	Filisur	EFB	1	10
1991-10-15	Graubünden	Albula (bis 2007)		AFB	0	0
1993-08-15	Graubünden	Albula (bis 2007)		AFB	0	0
1994-06-15	Graubünden	Albula (bis 2007)		AFB	0	0
1994-06-15	Graubünden	Albula (bis 2007)		AFB	0	0
1995-07-15	Graubünden	Albula (bis 2007)		EFB	0	0
1996-08-15	Graubünden	Albula (bis 2007)		EFB	0	0
1997-05-15	Graubünden	Albula (bis 2007)	Filisur	EFB	0	0
1999-04-14	Graubünden	Albula (bis 2007)	Surava	AFB	2	2
1999-05-17	Graubünden	Albula (bis 2007)	Alvaneu	EFB	1	0
1999-05-18	Graubünden	Albula (bis 2007)	Alvaneu	EFB	1	0
1999-05-27	Graubünden	Albula (bis 2007)	Vaz/Obervaz	AFB	1	1
1999-08-13	Graubünden	Albula (bis 2007)	Savognin	EFB	2	0
2000-07-03	Graubünden	Albula (bis 2007)	Alvaneu	EFB	1	1
2002-05-07	Graubünden	Albula (bis 2007)	Alvaneu	EFB	1	0
2003-07-08	Graubünden	Albula (bis 2007)	Tinizong-Rona	EFB	4	4
2003-07-22	Graubünden	Albula (bis 2007)	Alvaschein	AFB	9	9
2005-03-31	Graubünden	Albula (bis 2007)	Schluein	AFB	1	0
2005-05-11	Graubünden	Albula (bis 2007)	Bergün/Bravuogn	AFB	1	0
2006-03-24	Graubünden	Albula (bis 2007)	Cunter	AFB	1	1
2006-04-10	Graubünden	Albula (bis 2007)	Vaz/Obervaz	AFB	1	0
2006-05-19	Graubünden	Albula (bis 2007)	Vaz/Obervaz	AFB	1	0
2006-06-12	Graubünden	Albula (bis 2007)	Filisur	EFB	1	0
2006-06-25	Graubünden	Albula (bis 2007)	Savognin	EFB	1	0
2007-05-15	Graubünden	Albula (bis 2007)	Bergün/Bravuogn	AFB	1	0
2009-08-06	Graubünden	Albula (bis 2007)	Tinizong-Rona	AFB	5	5
1993-03-15	Sankt Gallen	Alttoggenburg (bis 2009)		Varroa destructor	0	0
1993-03-15	Sankt Gallen	Alttoggenburg (bis 2009)		Varroa destructor	0	0
1993-04-15	Sankt Gallen	Alttoggenburg (bis 2009)	Kirchberg (SG)	Varroa destructor	0	0
1994-11-15	Sankt Gallen	Alttoggenburg (bis 2009)		Varroa destructor	0	0
1995-04-15	Sankt Gallen	Alttoggenburg (bis 2009)		Varroa destructor	0	0
2000-04-13	Sankt Gallen	Alttoggenburg (bis 2009)	Mosnang	AFB	14	0
2002-06-28	Sankt Gallen	Alttoggenburg (bis 2009)	Lütisburg	EFB	4	0
2003-05-01	Sankt Gallen	Alttoggenburg (bis 2009)	Kirchberg (SG)	EFB	3	0
2003-05-01	Sankt Gallen	Alttoggenburg (bis 2009)	Kirchberg (SG)	EFB	0	0
2003-06-28	Sankt Gallen	Alttoggenburg (bis 2009)	Lütisburg	EFB	0	0
2008-04-19	Sankt Gallen	Alttoggenburg (bis 2009)	Lütisburg	EFB	0	0
2000-06-10	Zürich	Andelfingen	Benken (ZH)	EFB	1	0
2003-03-26	Zürich	Andelfingen	Trüllikon	Varroa destructor	1	0
2007-05-31	Zürich	Andelfingen	Thalheim an der Thur	EFB	1	0
2008-04-15	Zürich	Andelfingen	Truttikon	EFB	0	0
2008-04-29	Zürich	Andelfingen	Truttikon	EFB	1	0
2008-05-06	Zürich	Andelfingen	Ossingen	EFB	1	0
2008-05-14	Zürich	Andelfingen	Marthalen	EFB	0	0
2008-05-19	Zürich	Andelfingen	Marthalen	EFB	0	0
2008-05-20	Zürich	Andelfingen	Marthalen	EFB	0	0
2008-05-20	Zürich	Andelfingen	Trüllikon	EFB	0	0
2008-05-20	Zürich	Andelfingen	Marthalen	EFB	0	0
2008-05-20	Zürich	Andelfingen	Marthalen	EFB	0	0
2008-05-27	Zürich	Andelfingen	Thalheim an der Thur	EFB	0	0
2008-06-10	Zürich	Andelfingen	Trüllikon	EFB	0	0
2008-06-27	Zürich	Andelfingen	Trüllikon	EFB	1	1
2008-06-27	Zürich	Andelfingen	Adlikon	EFB	1	1
2008-08-05	Zürich	Andelfingen	Waltalingen	EFB	26	0
2008-08-11	Zürich	Andelfingen	Kleinandelfingen	EFB	13	0
2008-08-13	Zürich	Andelfingen	Oberstammheim	EFB	10	0
2009-03-17	Zürich	Andelfingen	Marthalen	EFB	1	0
2009-03-17	Zürich	Andelfingen	Oberstammheim	EFB	1	0
2009-04-07	Zürich	Andelfingen	Marthalen	EFB	1	0
2009-04-15	Zürich	Andelfingen	Ossingen	EFB	1	0
2009-04-28	Zürich	Andelfingen	Ossingen	EFB	0	0
2009-05-05	Zürich	Andelfingen	Andelfingen	EFB	18	0
2009-06-10	Zürich	Andelfingen	Ossingen	EFB	1	0
2009-07-07	Zürich	Andelfingen	Waltalingen	EFB	16	0
2009-07-28	Zürich	Andelfingen	Waltalingen	EFB	45	0
2009-08-07	Zürich	Andelfingen	Buch am Irchel	EFB	3	0
2009-08-11	Zürich	Andelfingen	Rheinau	EFB	2	0
2009-09-04	Zürich	Andelfingen	Trüllikon	EFB	3	0
2010-04-16	Zürich	Andelfingen	Trüllikon	EFB	1	0
2010-04-20	Zürich	Andelfingen	Buch am Irchel	EFB	0	0
2010-04-23	Zürich	Andelfingen	Ossingen	EFB	1	0
2010-04-27	Zürich	Andelfingen	Ossingen	EFB	1	0
2010-05-05	Zürich	Andelfingen	Ossingen	EFB	1	0
2010-05-05	Zürich	Andelfingen	Kleinandelfingen	EFB	1	0
2010-05-18	Zürich	Andelfingen	Ossingen	EFB	1	0
2010-05-18	Zürich	Andelfingen	Flaach	EFB	1	0
2010-06-10	Zürich	Andelfingen	Ossingen	EFB	1	0
2010-09-03	Zürich	Andelfingen	Rheinau	EFB	1	0
2011-04-06	Zürich	Andelfingen	Humlikon	EFB	1	0
2011-04-06	Zürich	Andelfingen	Buch am Irchel	EFB	1	0
2011-04-15	Zürich	Andelfingen	Berg am Irchel	EFB	1	0
2011-04-15	Zürich	Andelfingen	Berg am Irchel	EFB	1	0
2011-04-20	Zürich	Andelfingen	Buch am Irchel	EFB	1	0
2011-04-27	Zürich	Andelfingen	Buch am Irchel	EFB	1	0
2011-04-27	Zürich	Andelfingen	Kleinandelfingen	EFB	1	0
2011-05-03	Zürich	Andelfingen	Kleinandelfingen	EFB	1	0
2011-05-03	Zürich	Andelfingen	Buch am Irchel	EFB	1	0
2011-05-26	Zürich	Andelfingen	Thalheim an der Thur	EFB	1	0
2012-04-19	Zürich	Andelfingen	Trüllikon	EFB	1	0
2012-05-04	Zürich	Andelfingen	Henggart	EFB	1	0
2012-05-04	Zürich	Andelfingen	Kleinandelfingen	EFB	1	0
2012-05-04	Zürich	Andelfingen	Kleinandelfingen	EFB	1	0
2012-05-22	Zürich	Andelfingen	Henggart	EFB	1	0
2012-07-06	Zürich	Andelfingen	Adlikon	EFB	1	0
2013-04-30	Zürich	Andelfingen	Marthalen	EFB	1	0
2013-05-07	Zürich	Andelfingen	Marthalen	EFB	1	0
2013-05-07	Zürich	Andelfingen	Andelfingen	EFB	5	0
2013-05-14	Zürich	Andelfingen	Laufen-Uhwiesen	EFB	2	0
2013-05-22	Zürich	Andelfingen	Laufen-Uhwiesen	EFB	1	0
2013-05-31	Zürich	Andelfingen	Andelfingen	EFB	1	0
2013-06-07	Zürich	Andelfingen	Kleinandelfingen	AFB	1	0
2013-06-07	Zürich	Andelfingen	Kleinandelfingen	EFB	1	0
2013-07-01	Zürich	Andelfingen	Feuerthalen	EFB	1	0
2013-07-01	Zürich	Andelfingen	Adlikon	EFB	3	0
2013-07-01	Zürich	Andelfingen	Andelfingen	EFB	1	0
2013-07-01	Zürich	Andelfingen	Kleinandelfingen	EFB	2	0
2013-07-01	Zürich	Andelfingen	Flurlingen	EFB	1	0
2013-07-01	Zürich	Andelfingen	Humlikon	EFB	1	0
2013-07-01	Zürich	Andelfingen	Kleinandelfingen	EFB	1	0
2013-07-04	Zürich	Andelfingen	Andelfingen	EFB	1	0
2013-07-11	Zürich	Andelfingen	Ossingen	EFB	1	0
2013-07-12	Zürich	Andelfingen	Andelfingen	EFB	2	0
2013-07-16	Zürich	Andelfingen	Ossingen	EFB	1	0
2013-07-16	Zürich	Andelfingen	Andelfingen	EFB	1	0
2013-07-17	Zürich	Andelfingen	Feuerthalen	EFB	1	0
2013-09-10	Zürich	Andelfingen	Berg am Irchel	EFB	1	0
2014-04-09	Zürich	Andelfingen	Marthalen	AFB	1	0
2014-04-23	Zürich	Andelfingen	Ossingen	EFB	1	0
2014-05-06	Zürich	Andelfingen	Kleinandelfingen	EFB	2	0
2014-06-05	Zürich	Andelfingen	Kleinandelfingen	EFB	1	0
2015-07-07	Zürich	Andelfingen	Oberstammheim	EFB	1	0
2015-07-10	Zürich	Andelfingen	Oberstammheim	EFB	1	0
2015-07-16	Zürich	Andelfingen	Flaach	EFB	1	0
2015-09-09	Zürich	Andelfingen	Henggart	EFB	1	0
2016-04-06	Zürich	Andelfingen	Waltalingen	EFB	1	0
2016-04-06	Zürich	Andelfingen	Waltalingen	EFB	1	0
2016-04-14	Zürich	Andelfingen	Buch am Irchel	EFB	1	0
2016-04-14	Zürich	Andelfingen	Buch am Irchel	EFB	1	0
2016-04-19	Zürich	Andelfingen	Henggart	EFB	4	0
2016-04-19	Zürich	Andelfingen	Henggart	EFB	2	0
2016-05-03	Zürich	Andelfingen	Buch am Irchel	EFB	6	0
2016-05-18	Zürich	Andelfingen	Rheinau	EFB	1	0
2016-05-23	Zürich	Andelfingen	Ossingen	EFB	1	0
2016-05-31	Zürich	Andelfingen	Oberstammheim	EFB	2	0
2016-06-09	Zürich	Andelfingen	Henggart	Varroa destructor	1	0
2016-09-01	Zürich	Andelfingen	Unterstammheim	EFB	1	0
2009-06-10	Appenzell Innerrhoden	Appenzell Innerrhoden	Gonten	EFB	1	1
2010-04-22	Appenzell Innerrhoden	Appenzell Innerrhoden	Appenzell	EFB	1	0
2010-04-26	Appenzell Innerrhoden	Appenzell Innerrhoden	Schlatt-Haslen	EFB	1	1
2010-04-26	Appenzell Innerrhoden	Appenzell Innerrhoden	Rüte	EFB	1	0
2010-04-26	Appenzell Innerrhoden	Appenzell Innerrhoden	Oberegg	EFB	2	2
2010-04-26	Appenzell Innerrhoden	Appenzell Innerrhoden	Rüte	Varroa destructor	1	0
2010-04-28	Appenzell Innerrhoden	Appenzell Innerrhoden	Schlatt-Haslen	EFB	1	0
2010-04-29	Appenzell Innerrhoden	Appenzell Innerrhoden	Appenzell	EFB	1	0
2010-04-30	Appenzell Innerrhoden	Appenzell Innerrhoden	Gonten	EFB	1	1
2010-05-03	Appenzell Innerrhoden	Appenzell Innerrhoden	Gonten	EFB	1	0
2010-05-12	Appenzell Innerrhoden	Appenzell Innerrhoden	Oberegg	EFB	1	0
2010-05-25	Appenzell Innerrhoden	Appenzell Innerrhoden	Oberegg	EFB	1	0
2010-06-23	Appenzell Innerrhoden	Appenzell Innerrhoden	Schlatt-Haslen	EFB	2	2
2010-06-24	Appenzell Innerrhoden	Appenzell Innerrhoden	Schlatt-Haslen	EFB	2	2
2010-07-14	Appenzell Innerrhoden	Appenzell Innerrhoden	Rüte	EFB	1	0
2010-07-27	Appenzell Innerrhoden	Appenzell Innerrhoden	Appenzell	EFB	1	0
2010-09-16	Appenzell Innerrhoden	Appenzell Innerrhoden	Gonten	EFB	1	0
2011-03-30	Appenzell Innerrhoden	Appenzell Innerrhoden	Rüte	EFB	2	2
2011-04-11	Appenzell Innerrhoden	Appenzell Innerrhoden	Schlatt-Haslen	EFB	1	1
2011-05-04	Appenzell Innerrhoden	Appenzell Innerrhoden	Schlatt-Haslen	EFB	1	0
2012-05-11	Appenzell Innerrhoden	Appenzell Innerrhoden	Appenzell	EFB	1	0
2013-05-28	Appenzell Innerrhoden	Appenzell Innerrhoden	Oberegg	AFB	1	1
2013-06-12	Appenzell Innerrhoden	Appenzell Innerrhoden	Gonten	EFB	1	1
2014-04-30	Appenzell Innerrhoden	Appenzell Innerrhoden	Gonten	EFB	1	1
2015-05-07	Appenzell Innerrhoden	Appenzell Innerrhoden	Schlatt-Haslen	EFB	1	1
2015-07-07	Appenzell Innerrhoden	Appenzell Innerrhoden	Appenzell	EFB	3	3
2010-04-20	Thurgau	Arbon	Egnach	EFB	1	0
2010-04-26	Thurgau	Arbon	Egnach	EFB	1	0
2010-05-04	Thurgau	Arbon	Arbon	EFB	2	0
2010-05-04	Thurgau	Arbon	Romanshorn	EFB	1	0
2010-05-07	Thurgau	Arbon	Arbon	EFB	2	0
2010-05-07	Thurgau	Arbon	Arbon	EFB	2	0
2010-05-12	Thurgau	Arbon	Romanshorn	EFB	3	0
2010-06-24	Thurgau	Arbon	Egnach	EFB	1	0
2010-06-24	Thurgau	Arbon	Egnach	EFB	1	0
2010-06-29	Thurgau	Arbon	Roggwil (TG)	EFB	1	0
2011-04-08	Thurgau	Arbon	Egnach	EFB	2	2
2011-04-19	Thurgau	Arbon	Egnach	EFB	1	0
2012-04-30	Thurgau	Arbon	Egnach	EFB	1	0
2012-05-22	Thurgau	Arbon	Egnach	EFB	1	0
2012-07-19	Thurgau	Arbon	Uttwil	EFB	1	0
2013-05-14	Thurgau	Arbon	Roggwil (TG)	EFB	1	0
2013-05-28	Thurgau	Arbon	Amriswil	EFB	1	0
2013-05-28	Thurgau	Arbon	Romanshorn	EFB	2	0
2013-05-30	Thurgau	Arbon	Roggwil (TG)	EFB	1	0
2013-07-02	Thurgau	Arbon	Egnach	AFB	1	0
2013-07-11	Thurgau	Arbon	Roggwil (TG)	EFB	1	0
2013-07-11	Thurgau	Arbon	Arbon	EFB	1	0
2013-07-11	Thurgau	Arbon	Roggwil (TG)	EFB	1	0
2013-07-11	Thurgau	Arbon	Egnach	EFB	1	0
2013-07-30	Thurgau	Arbon	Amriswil	EFB	1	0
2013-08-14	Thurgau	Arbon	Egnach	EFB	1	0
2013-08-15	Thurgau	Arbon	Egnach	EFB	1	0
2013-09-10	Thurgau	Arbon	Hefenhofen	Varroa destructor	1	0
2014-04-23	Thurgau	Arbon	Roggwil (TG)	EFB	1	1
2014-05-02	Thurgau	Arbon	Amriswil	EFB	1	1
2014-05-06	Thurgau	Arbon	Egnach	EFB	1	1
2014-05-11	Thurgau	Arbon	Egnach	EFB	2	2
2014-07-03	Thurgau	Arbon	Amriswil	EFB	1	1
2015-05-02	Thurgau	Arbon	Amriswil	EFB	1	1
2015-05-02	Thurgau	Arbon	Uttwil	EFB	1	1
2015-05-28	Thurgau	Arbon	Egnach	EFB	2	2
2015-06-30	Thurgau	Arbon	Amriswil	EFB	1	1
2015-07-21	Thurgau	Arbon	Amriswil	EFB	1	1
2015-08-07	Thurgau	Arbon	Egnach	EFB	1	1
2016-04-05	Thurgau	Arbon	Arbon	EFB	5	5
2016-04-14	Thurgau	Arbon	Arbon	EFB	5	5
2016-05-14	Thurgau	Arbon	Egnach	EFB	2	2
2016-05-18	Thurgau	Arbon	Roggwil (TG)	EFB	1	1
2016-05-21	Thurgau	Arbon	Egnach	EFB	1	1
2016-05-21	Thurgau	Arbon	Egnach	EFB	2	2
2016-06-02	Thurgau	Arbon	Egnach	EFB	3	3
2016-06-06	Thurgau	Arbon	Egnach	EFB	2	2
2016-06-07	Thurgau	Arbon	Roggwil (TG)	EFB	1	1
2016-07-09	Thurgau	Arbon	Romanshorn	EFB	1	1
2016-07-11	Thurgau	Arbon	Dozwil	EFB	2	2
2016-07-16	Thurgau	Arbon	Romanshorn	EFB	1	1
2016-07-18	Thurgau	Arbon	Romanshorn	EFB	3	3
2016-07-27	Thurgau	Arbon	Roggwil (TG)	EFB	2	20
2016-08-02	Thurgau	Arbon	Kesswil	EFB	1	1
2016-08-03	Thurgau	Arbon	Arbon	EFB	1	1
2016-08-04	Thurgau	Arbon	Romanshorn	EFB	1	1
2016-08-04	Thurgau	Arbon	Kesswil	EFB	2	2
1993-02-15	Thurgau	Arbon (bis 2010)	Roggwil (TG)	Varroa destructor	0	0
1993-02-15	Thurgau	Arbon (bis 2010)	Roggwil (TG)	Varroa destructor	0	0
2003-06-03	Thurgau	Arbon (bis 2010)	Egnach	EFB	1	0
2007-05-30	Thurgau	Arbon (bis 2010)	Egnach	EFB	0	0
2007-08-21	Thurgau	Arbon (bis 2010)	Egnach	Varroa destructor	1	0
2008-04-11	Thurgau	Arbon (bis 2010)	Egnach	EFB	0	0
2008-04-18	Thurgau	Arbon (bis 2010)	Salmsach	EFB	0	0
2009-06-11	Thurgau	Arbon (bis 2010)	Kesswil	EFB	1	0
2009-06-22	Thurgau	Arbon (bis 2010)	Kesswil	EFB	6	0
2009-07-20	Thurgau	Arbon (bis 2010)	Egnach	EFB	5	0
2009-07-20	Thurgau	Arbon (bis 2010)	Egnach	EFB	1	0
2009-08-06	Thurgau	Arbon (bis 2010)	Romanshorn	EFB	2	0
2009-08-06	Thurgau	Arbon (bis 2010)	Romanshorn	EFB	2	0
2009-08-14	Thurgau	Arbon (bis 2010)	Sommeri	EFB	2	0
2010-04-20	Thurgau	Arbon (bis 2010)	Egnach	EFB	1	0
2010-04-22	Thurgau	Arbon (bis 2010)	Sommeri	EFB	2	0
2010-04-26	Thurgau	Arbon (bis 2010)	Salmsach	EFB	1	0
2010-04-27	Thurgau	Arbon (bis 2010)	Salmsach	EFB	1	0
2010-04-27	Thurgau	Arbon (bis 2010)	Sommeri	EFB	1	0
2010-04-28	Thurgau	Arbon (bis 2010)	Sommeri	EFB	1	0
2010-05-04	Thurgau	Arbon (bis 2010)	Romanshorn	EFB	1	0
2010-05-04	Thurgau	Arbon (bis 2010)	Egnach	EFB	2	0
2010-05-04	Thurgau	Arbon (bis 2010)	Salmsach	EFB	2	0
2010-05-12	Thurgau	Arbon (bis 2010)	Romanshorn	EFB	3	0
2010-05-18	Thurgau	Arbon (bis 2010)	Egnach	EFB	1	0
2010-06-24	Thurgau	Arbon (bis 2010)	Egnach	EFB	1	0
2010-06-24	Thurgau	Arbon (bis 2010)	Egnach	EFB	1	0
2010-08-17	Thurgau	Arbon (bis 2010)	Egnach	EFB	1	0
2010-08-24	Thurgau	Arbon (bis 2010)	Roggwil (TG)	EFB	1	1
2010-08-24	Thurgau	Arbon (bis 2010)	Egnach	EFB	1	0
2011-04-01	Thurgau	Arbon (bis 2010)	Egnach	EFB	3	3
2012-04-04	Thurgau	Arbon (bis 2010)	Egnach	EFB	1	0
2012-04-19	Thurgau	Arbon (bis 2010)	Romanshorn	EFB	2	0
2012-04-20	Thurgau	Arbon (bis 2010)	Salmsach	EFB	2	0
2012-05-14	Thurgau	Arbon (bis 2010)	Romanshorn	EFB	1	1
2012-05-15	Thurgau	Arbon (bis 2010)	Romanshorn	EFB	1	0
2012-05-22	Thurgau	Arbon (bis 2010)	Egnach	EFB	2	0
2012-05-22	Thurgau	Arbon (bis 2010)	Salmsach	EFB	1	0
2012-07-19	Thurgau	Arbon (bis 2010)	Kesswil	EFB	1	0
2012-07-19	Thurgau	Arbon (bis 2010)	Kesswil	EFB	4	0
2012-07-19	Thurgau	Arbon (bis 2010)	Uttwil	EFB	1	0
2012-07-19	Thurgau	Arbon (bis 2010)	Kesswil	EFB	1	0
2013-05-28	Thurgau	Arbon (bis 2010)	Kesswil	EFB	1	0
2014-07-24	Thurgau	Arbon (bis 2010)	Egnach	EFB	1	1
1993-06-15	Basel-Landschaft	Arlesheim		AFB	0	0
2008-07-29	Basel-Landschaft	Arlesheim	Reinach (BL)	AFB	1	0
2009-05-05	Basel-Landschaft	Arlesheim	Reinach (BL)	EFB	1	5
2011-04-13	Basel-Landschaft	Arlesheim	Aesch (BL)	AFB	3	3
2011-04-13	Basel-Landschaft	Arlesheim	Reinach (BL)	AFB	3	7
2014-07-24	Basel-Landschaft	Arlesheim	Allschwil	EFB	1	1
2014-07-24	Basel-Landschaft	Arlesheim	Allschwil	EFB	1	0
2014-08-13	Basel-Landschaft	Arlesheim	Binningen	EFB	2	2
2014-08-14	Basel-Landschaft	Arlesheim	Binningen	EFB	1	1
2014-08-14	Basel-Landschaft	Arlesheim	Allschwil	EFB	1	1
2014-08-14	Basel-Landschaft	Arlesheim	Allschwil	EFB	1	1
2014-08-14	Basel-Landschaft	Arlesheim	Binningen	EFB	2	2
2014-08-14	Basel-Landschaft	Arlesheim	Allschwil	EFB	2	2
2014-08-14	Basel-Landschaft	Arlesheim	Binningen	EFB	5	5
2014-08-14	Basel-Landschaft	Arlesheim	Binningen	EFB	2	2
2014-08-14	Basel-Landschaft	Arlesheim	Binningen	EFB	1	1
2014-08-14	Basel-Landschaft	Arlesheim	Binningen	EFB	4	4
2014-08-14	Basel-Landschaft	Arlesheim	Binningen	EFB	1	1
2014-08-15	Basel-Landschaft	Arlesheim	Basel	EFB	4	4
2014-08-20	Basel-Landschaft	Arlesheim	Oberwil (BL)	EFB	1	1
2014-08-20	Basel-Landschaft	Arlesheim	Bottmingen	EFB	1	1
2014-08-22	Basel-Landschaft	Arlesheim	Bottmingen	EFB	1	1
2014-09-04	Basel-Landschaft	Arlesheim	Oberwil (BL)	EFB	4	7
2014-09-04	Basel-Landschaft	Arlesheim	Binningen	EFB	1	1
2014-09-04	Basel-Landschaft	Arlesheim	Oberwil (BL)	EFB	8	13
2014-09-05	Basel-Landschaft	Arlesheim	Oberwil (BL)	EFB	8	8
2014-09-12	Basel-Landschaft	Arlesheim	Oberwil (BL)	EFB	3	4
2014-09-12	Basel-Landschaft	Arlesheim	Oberwil (BL)	EFB	13	13
2014-09-12	Basel-Landschaft	Arlesheim	Oberwil (BL)	EFB	1	2
2014-09-18	Basel-Landschaft	Arlesheim	Oberwil (BL)	EFB	9	9
2014-09-23	Basel-Landschaft	Arlesheim	Biel-Benken	EFB	1	1
2014-09-23	Basel-Landschaft	Arlesheim	Oberwil (BL)	EFB	2	2
2014-09-29	Basel-Landschaft	Arlesheim	Therwil	EFB	4	4
2014-09-29	Basel-Landschaft	Arlesheim	Therwil	EFB	1	1
2014-09-29	Basel-Landschaft	Arlesheim	Oberwil (BL)	EFB	7	7
2014-10-13	Basel-Landschaft	Arlesheim	Therwil	EFB	1	2
2014-10-13	Basel-Landschaft	Arlesheim	Reinach (BL)	EFB	3	5
2014-10-13	Basel-Landschaft	Arlesheim	Reinach (BL)	EFB	1	1
2014-10-13	Basel-Landschaft	Arlesheim	Biel-Benken	EFB	4	4
2014-10-15	Basel-Landschaft	Arlesheim	Therwil	EFB	2	2
2014-10-15	Basel-Landschaft	Arlesheim	Biel-Benken	EFB	2	2
2014-10-16	Basel-Landschaft	Arlesheim	Therwil	EFB	1	1
2014-11-05	Basel-Landschaft	Arlesheim	Arlesheim	EFB	2	4
2014-11-05	Basel-Landschaft	Arlesheim	Binningen	EFB	1	2
2016-07-02	Basel-Landschaft	Arlesheim	Arlesheim	EFB	2	4
1991-09-15	Waadt	Aubonne		AFB	5	0
1992-09-15	Waadt	Aubonne		AFB	0	0
1994-07-15	Waadt	Aubonne	Bière	AFB	0	0
1994-08-15	Waadt	Aubonne		EFB	0	0
1996-08-13	Waadt	Aubonne		AFB	1	0
1999-05-05	Waadt	Aubonne	Bière	AFB	1	0
1999-09-23	Waadt	Aubonne	Mollens (VD)	Varroa destructor	3	0
2000-09-08	Waadt	Aubonne	Gimel	AFB	1	0
2000-09-12	Waadt	Aubonne	Saint-Oyens	AFB	1	0
2002-06-14	Waadt	Aubonne	Gimel	EFB	1	1
1998-08-11	Waadt	Avenches	Villars-le-Grand	AFB	1	0
1995-01-15	Aargau	Baden		Varroa destructor	0	0
1995-06-15	Aargau	Baden		AFB	0	8
2003-04-02	Aargau	Baden	Oberrohrdorf	AFB	0	0
2003-04-17	Aargau	Baden	Oberrohrdorf	AFB	3	3
2003-11-14	Aargau	Baden	Mellingen	AFB	0	0
2010-07-23	Aargau	Baden	Stetten (AG)	AFB	1	1
2011-03-31	Aargau	Baden	Würenlos	EFB	1	0
2011-04-15	Aargau	Baden	Würenlos	AFB	6	6
2014-06-19	Aargau	Baden	Würenlos	EFB	1	1
2015-06-05	Aargau	Baden	Baden	EFB	1	1
2016-07-12	Aargau	Baden	Würenlos	EFB	1	1
2002-06-03	Solothurn	Balsthal-Gäu	Egerkingen	AFB	4	4
2004-04-29	Solothurn	Balsthal-Gäu	Egerkingen	EFB	1	1
2004-06-12	Solothurn	Balsthal-Gäu	Egerkingen	EFB	3	3
2005-04-29	Solothurn	Balsthal-Gäu	Egerkingen	EFB	8	0
2005-05-02	Solothurn	Balsthal-Gäu	Härkingen	EFB	8	0
2005-05-03	Solothurn	Balsthal-Gäu	Oberbuchsiten	EFB	2	0
2005-05-03	Solothurn	Balsthal-Gäu	Egerkingen	EFB	1	0
2005-05-28	Solothurn	Balsthal-Gäu	Oberbuchsiten	EFB	1	1
2005-05-30	Solothurn	Balsthal-Gäu	Oberbuchsiten	EFB	4	4
2006-04-08	Solothurn	Balsthal-Gäu	Neuendorf	EFB	2	0
2006-04-22	Solothurn	Balsthal-Gäu	Neuendorf	EFB	2	2
2006-04-22	Solothurn	Balsthal-Gäu	Neuendorf	EFB	5	5
2006-05-06	Solothurn	Balsthal-Gäu	Härkingen	EFB	3	3
2006-05-26	Solothurn	Balsthal-Gäu	Niederbuchsiten	EFB	1	1
2008-04-30	Solothurn	Balsthal-Gäu	Wolfwil	EFB	0	2
2008-05-24	Solothurn	Balsthal-Gäu	Kestenholz	EFB	1	1
2008-06-30	Solothurn	Balsthal-Gäu	Niederbuchsiten	EFB	1	1
2008-08-18	Solothurn	Balsthal-Gäu	Oensingen	EFB	2	2
2010-04-07	Solothurn	Balsthal-Gäu	Egerkingen	EFB	1	0
2010-05-11	Solothurn	Balsthal-Gäu	Niederbuchsiten	EFB	1	0
2010-05-11	Solothurn	Balsthal-Gäu	Oensingen	EFB	1	0
2010-05-25	Solothurn	Balsthal-Gäu	Egerkingen	EFB	1	0
2010-06-01	Solothurn	Balsthal-Gäu	Egerkingen	EFB	1	0
2010-06-07	Solothurn	Balsthal-Gäu	Wolfwil	EFB	1	0
2010-06-08	Solothurn	Balsthal-Gäu	Oensingen	EFB	3	3
2010-06-14	Solothurn	Balsthal-Gäu	Oensingen	EFB	1	1
2010-06-16	Solothurn	Balsthal-Gäu	Wolfwil	EFB	2	2
2010-06-16	Solothurn	Balsthal-Gäu	Wolfwil	Varroa destructor	1	0
2010-06-25	Solothurn	Balsthal-Gäu	Oensingen	EFB	1	1
2011-04-11	Solothurn	Balsthal-Gäu	Wolfwil	EFB	2	2
2011-04-13	Solothurn	Balsthal-Gäu	Wolfwil	EFB	1	1
2011-05-27	Solothurn	Balsthal-Gäu	Egerkingen	EFB	2	2
2012-04-28	Solothurn	Balsthal-Gäu	Egerkingen	EFB	1	0
2012-05-15	Solothurn	Balsthal-Gäu	Kestenholz	EFB	3	3
2012-05-18	Solothurn	Balsthal-Gäu	Oberbuchsiten	EFB	3	3
2012-05-18	Solothurn	Balsthal-Gäu	Kestenholz	EFB	1	1
2012-06-28	Solothurn	Balsthal-Gäu	Kestenholz	EFB	1	1
2009-09-24	Solothurn	Balsthal-Tal	Matzendorf	EFB	1	1
2010-04-13	Solothurn	Balsthal-Tal	Herbetswil	EFB	1	0
2010-04-21	Solothurn	Balsthal-Tal	Herbetswil	EFB	1	0
2010-04-23	Solothurn	Balsthal-Tal	Laupersdorf	EFB	1	0
2010-05-05	Solothurn	Balsthal-Tal	Balsthal	EFB	1	0
2010-05-05	Solothurn	Balsthal-Tal	Mümliswil-Ramiswil	EFB	1	0
2010-05-11	Solothurn	Balsthal-Tal	Laupersdorf	EFB	1	0
2010-05-18	Solothurn	Balsthal-Tal	Aedermannsdorf	EFB	1	0
2010-05-26	Solothurn	Balsthal-Tal	Balsthal	EFB	1	0
2010-06-01	Solothurn	Balsthal-Tal	Aedermannsdorf	EFB	1	0
2010-07-01	Solothurn	Balsthal-Tal	Balsthal	EFB	3	3
2011-03-25	Solothurn	Balsthal-Tal	Laupersdorf	EFB	2	2
2011-04-04	Solothurn	Balsthal-Tal	Balsthal	EFB	1	1
2011-04-05	Solothurn	Balsthal-Tal	Herbetswil	EFB	1	1
2011-04-07	Solothurn	Balsthal-Tal	Herbetswil	EFB	2	2
2011-04-08	Solothurn	Balsthal-Tal	Mümliswil-Ramiswil	EFB	1	1
2011-04-11	Solothurn	Balsthal-Tal	Balsthal	EFB	1	1
2011-04-19	Solothurn	Balsthal-Tal	Matzendorf	EFB	5	5
2011-04-19	Solothurn	Balsthal-Tal	Matzendorf	EFB	2	2
2011-04-19	Solothurn	Balsthal-Tal	Matzendorf	EFB	3	3
2011-04-20	Solothurn	Balsthal-Tal	Matzendorf	EFB	3	3
2011-05-02	Solothurn	Balsthal-Tal	Matzendorf	EFB	1	1
2011-05-18	Solothurn	Balsthal-Tal	Balsthal	EFB	1	1
2011-05-27	Solothurn	Balsthal-Tal	Laupersdorf	EFB	7	7
2011-06-07	Solothurn	Balsthal-Tal	Matzendorf	EFB	1	1
2012-04-09	Solothurn	Balsthal-Tal	Matzendorf	EFB	1	0
2012-07-20	Solothurn	Balsthal-Tal	Matzendorf	EFB	5	5
2012-07-20	Solothurn	Balsthal-Tal	Laupersdorf	EFB	2	2
2013-04-24	Solothurn	Balsthal-Tal	Matzendorf	EFB	1	1
2013-05-07	Solothurn	Balsthal-Tal	Laupersdorf	EFB	1	1
2013-05-09	Solothurn	Balsthal-Tal	Laupersdorf	EFB	1	1
2013-05-21	Solothurn	Balsthal-Tal	Laupersdorf	EFB	2	2
2014-05-06	Solothurn	Balsthal-Tal	Balsthal	EFB	1	0
2014-05-06	Solothurn	Balsthal-Tal	Laupersdorf	EFB	1	0
2014-05-12	Solothurn	Balsthal-Tal	Laupersdorf	EFB	1	0
2015-04-10	Solothurn	Balsthal-Tal	Laupersdorf	EFB	1	0
2015-04-16	Solothurn	Balsthal-Tal	Laupersdorf	EFB	2	0
2015-05-05	Solothurn	Balsthal-Tal	Balsthal	EFB	1	0
2015-05-09	Solothurn	Balsthal-Tal	Balsthal	EFB	1	0
2015-05-11	Solothurn	Balsthal-Tal	Balsthal	EFB	1	0
2016-04-30	Solothurn	Balsthal-Tal	Balsthal	EFB	1	0
1996-09-15	Basel-Stadt	Basel-Stadt	Basel	AFB	2	0
1996-09-15	Basel-Stadt	Basel-Stadt	Basel	AFB	0	0
2012-09-17	Basel-Stadt	Basel-Stadt	Basel	AFB	9	9
2016-05-13	Basel-Stadt	Basel-Stadt	Riehen	AFB	1	0
1998-06-24	Tessin	Bellinzona	Medeglia	AFB	13	13
2000-05-01	Tessin	Bellinzona	Medeglia	AFB	3	3
2000-05-04	Tessin	Bellinzona	Preonzo	AFB	1	1
2000-10-03	Tessin	Bellinzona	Preonzo	AFB	3	3
2000-10-06	Tessin	Bellinzona	Gnosca	AFB	3	0
2002-05-22	Tessin	Bellinzona	Gnosca	AFB	2	7
2014-08-27	Tessin	Bellinzona	Gorduno	EFB	1	2
2014-12-18	Tessin	Bellinzona	Bellinzona	AFB	2	2
2014-12-19	Tessin	Bellinzona	Lumino	AFB	4	0
2015-04-20	Tessin	Bellinzona	Bellinzona	EFB	1	1
2015-08-08	Tessin	Bellinzona	Bellinzona	AFB	4	4
1993-04-15	Bern	Bern		AFB	0	0
1993-04-15	Bern	Bern	Muri bei Bern	AFB	0	0
1993-04-15	Bern	Bern		AFB	0	0
1993-04-15	Bern	Bern		AFB	0	0
1994-08-15	Bern	Bern		AFB	0	0
2000-06-02	Bern	Bern	Oberbalm	AFB	3	0
2000-06-02	Bern	Bern	Oberbalm	AFB	2	0
2000-06-26	Bern	Bern	Oberbalm	AFB	2	0
2000-07-04	Bern	Bern	Oberbalm	AFB	1	0
2000-08-12	Bern	Bern	Oberbalm	AFB	1	6
2000-09-05	Bern	Bern	Köniz	EFB	1	0
2000-09-05	Bern	Bern	Köniz	EFB	1	0
2001-04-09	Bern	Bern	Oberbalm	AFB	2	0
2001-05-11	Bern	Bern	Köniz	AFB	3	0
2001-05-12	Bern	Bern	Oberbalm	AFB	2	8
2001-05-14	Bern	Bern	Köniz	AFB	1	0
2001-05-14	Bern	Bern	Köniz	AFB	1	0
2001-06-12	Bern	Bern	Bern	EFB	2	0
2001-06-16	Bern	Bern	Köniz	EFB	1	0
2001-06-21	Bern	Bern	Köniz	AFB	3	0
2001-06-21	Bern	Bern	Köniz	AFB	1	0
2001-07-13	Bern	Bern	Köniz	AFB	1	0
2001-07-31	Bern	Bern	Köniz	EFB	2	0
2001-08-17	Bern	Bern	Köniz	AFB	1	0
2002-04-20	Bern	Bern	Köniz	AFB	2	0
2002-04-20	Bern	Bern	Köniz	AFB	2	0
2002-04-22	Bern	Bern	Köniz	AFB	1	0
2002-07-08	Bern	Bern	Köniz	AFB	1	0
2002-10-02	Bern	Bern	Oberbalm	AFB	4	0
2002-10-09	Bern	Bern	Wohlen bei Bern	EFB	1	0
2002-10-16	Bern	Bern	Kirchlindach	EFB	1	0
2003-04-11	Bern	Bern	Kirchlindach	EFB	1	0
2003-04-17	Bern	Bern	Oberbalm	AFB	1	0
2003-04-26	Bern	Bern	Oberbalm	AFB	1	0
2003-04-28	Bern	Bern	Oberbalm	EFB	1	0
2003-04-30	Bern	Bern	Oberbalm	EFB	1	0
2003-05-08	Bern	Bern	Köniz	EFB	4	0
2003-05-12	Bern	Bern	Köniz	EFB	1	0
2003-05-13	Bern	Bern	Köniz	EFB	2	0
2003-05-14	Bern	Bern	Köniz	EFB	1	0
2003-06-12	Bern	Bern	Bern	EFB	2	0
2003-06-12	Bern	Bern	Wohlen bei Bern	EFB	0	0
2003-07-08	Bern	Bern	Ostermundigen	EFB	1	0
2003-07-21	Bern	Bern	Köniz	AFB	3	0
2003-07-21	Bern	Bern	Köniz	EFB	1	0
2003-07-21	Bern	Bern	Bern	EFB	1	0
2003-08-09	Bern	Bern	Ostermundigen	EFB	2	0
2003-08-11	Bern	Bern	Bern	EFB	1	0
2003-08-21	Bern	Bern	Köniz	AFB	1	0
2003-08-25	Bern	Bern	Köniz	AFB	3	0
2003-09-01	Bern	Bern	Wohlen bei Bern	EFB	1	0
2003-09-04	Bern	Bern	Vechigen	AFB	7	0
2003-09-07	Bern	Bern	Vechigen	AFB	3	0
2003-09-15	Bern	Bern	Vechigen	EFB	1	0
2003-09-29	Bern	Bern	Köniz	AFB	4	0
2004-05-01	Bern	Bern	Vechigen	EFB	6	0
2004-05-15	Bern	Bern	Vechigen	EFB	1	0
2004-05-21	Bern	Bern	Köniz	EFB	3	0
2004-06-14	Bern	Bern	Wohlen bei Bern	EFB	1	0
2004-06-16	Bern	Bern	Oberbalm	EFB	5	0
2004-06-16	Bern	Bern	Bern	EFB	1	0
2004-07-02	Bern	Bern	Bern	EFB	1	0
2004-07-02	Bern	Bern	Bern	EFB	1	0
2004-08-05	Bern	Bern	Wohlen bei Bern	EFB	2	0
2005-04-21	Bern	Bern	Bern	EFB	2	0
2005-04-30	Bern	Bern	Vechigen	AFB	4	0
2005-04-30	Bern	Bern	Vechigen	EFB	2	0
2005-05-17	Bern	Bern	Wohlen bei Bern	EFB	1	0
2005-05-21	Bern	Bern	Vechigen	EFB	1	0
2005-05-23	Bern	Bern	Bremgarten bei Bern	EFB	1	0
2005-05-25	Bern	Bern	Bern	EFB	2	0
2005-06-11	Bern	Bern	Kirchlindach	EFB	2	0
2005-08-01	Bern	Bern	Vechigen	EFB	4	0
2005-09-08	Bern	Bern	Wohlen bei Bern	EFB	1	0
2006-04-18	Bern	Bern	Wohlen bei Bern	EFB	1	0
2006-04-25	Bern	Bern	Wohlen bei Bern	EFB	1	0
2006-05-01	Bern	Bern	Köniz	EFB	2	0
2006-05-15	Bern	Bern	Bern	EFB	1	0
2006-05-16	Bern	Bern	Vechigen	EFB	2	0
2006-05-24	Bern	Bern	Köniz	EFB	1	0
2006-05-25	Bern	Bern	Köniz	EFB	2	0
2006-06-08	Bern	Bern	Köniz	EFB	1	0
2006-06-12	Bern	Bern	Kirchlindach	EFB	2	0
2006-06-15	Bern	Bern	Köniz	EFB	2	0
2006-06-24	Bern	Bern	Kirchlindach	EFB	3	0
2006-07-31	Bern	Bern	Köniz	AFB	1	0
2006-08-18	Bern	Bern	Oberbalm	EFB	1	0
2006-08-18	Bern	Bern	Oberbalm	EFB	1	0
2007-04-10	Bern	Bern	Wohlen bei Bern	EFB	1	0
2007-04-24	Bern	Bern	Köniz	EFB	7	0
2007-04-25	Bern	Bern	Oberbalm	EFB	5	0
2007-04-30	Bern	Bern	Wohlen bei Bern	EFB	1	0
2007-05-14	Bern	Bern	Ostermundigen	EFB	1	0
2007-05-23	Bern	Bern	Kirchlindach	EFB	1	0
2007-05-30	Bern	Bern	Oberbalm	EFB	2	0
2007-06-08	Bern	Bern	Köniz	EFB	3	0
2007-06-19	Bern	Bern	Zollikofen	EFB	1	0
2007-08-15	Bern	Bern	Bremgarten bei Bern	EFB	2	0
2008-05-28	Bern	Bern	Vechigen	EFB	1	0
2008-06-02	Bern	Bern	Köniz	EFB	1	0
2008-06-03	Bern	Bern	Wohlen bei Bern	EFB	4	0
2008-06-03	Bern	Bern	Wohlen bei Bern	EFB	2	0
2008-06-16	Bern	Bern	Köniz	EFB	6	0
2008-06-17	Bern	Bern	Oberbalm	EFB	2	0
2008-07-15	Bern	Bern	Bern	EFB	2	0
2008-07-22	Bern	Bern	Köniz	EFB	2	0
2009-03-27	Bern	Bern	Zollikofen	EFB	1	0
2009-04-15	Bern	Bern	Köniz	EFB	1	0
2009-05-07	Bern	Bern	Oberbalm	EFB	1	0
2009-05-13	Bern	Bern	Köniz	EFB	1	0
2009-05-26	Bern	Bern	Oberbalm	EFB	1	0
2009-05-26	Bern	Bern	Köniz	EFB	1	0
2009-05-26	Bern	Bern	Köniz	EFB	1	0
2009-06-19	Bern	Bern	Oberbalm	EFB	1	0
2009-08-20	Bern	Bern	Oberbalm	EFB	1	0
2009-08-20	Bern	Bern	Vechigen	EFB	1	0
2009-10-07	Bern	Bern	Kirchlindach	EFB	1	0
2010-04-28	Bern	Bern	Oberbalm	EFB	1	0
2010-04-28	Bern	Bern	Oberbalm	EFB	1	0
2010-04-28	Bern	Bern	Oberbalm	EFB	1	0
2010-05-11	Bern	Bern	Oberbalm	EFB	1	0
2010-05-31	Bern	Bern	Vechigen	EFB	1	0
2010-06-01	Bern	Bern	Vechigen	EFB	1	0
2010-06-01	Bern	Bern	Vechigen	EFB	1	0
2010-06-01	Bern	Bern	Köniz	EFB	1	0
2010-06-02	Bern	Bern	Köniz	EFB	1	0
2010-06-12	Bern	Bern	Vechigen	EFB	1	0
2010-06-17	Bern	Bern	Köniz	EFB	1	0
2010-06-26	Bern	Bern	Kirchlindach	EFB	1	0
2010-07-27	Bern	Bern	Bolligen	EFB	1	0
2010-08-20	Bern	Bern	Köniz	EFB	1	0
2010-08-23	Bern	Bern	Vechigen	EFB	1	0
2010-09-08	Bern	Bern	Vechigen	EFB	1	0
2011-04-04	Bern	Bern	Vechigen	EFB	1	0
2011-04-11	Bern	Bern	Vechigen	EFB	1	0
2011-04-11	Bern	Bern	Vechigen	EFB	1	0
2011-04-12	Bern	Bern	Bolligen	EFB	1	0
2011-04-12	Bern	Bern	Bolligen	EFB	1	0
2011-04-14	Bern	Bern	Oberbalm	AFB	1	0
2011-04-14	Bern	Bern	Oberbalm	AFB	1	0
2011-04-14	Bern	Bern	Oberbalm	EFB	1	0
2011-04-14	Bern	Bern	Köniz	EFB	1	0
2011-04-14	Bern	Bern	Oberbalm	EFB	1	0
2011-04-14	Bern	Bern	Oberbalm	EFB	1	0
2011-04-28	Bern	Bern	Köniz	EFB	1	0
2011-04-28	Bern	Bern	Oberbalm	EFB	1	0
2011-05-06	Bern	Bern	Köniz	EFB	1	0
2011-05-19	Bern	Bern	Oberbalm	EFB	1	0
2011-06-14	Bern	Bern	Vechigen	EFB	1	0
2011-09-12	Bern	Bern	Vechigen	EFB	1	0
2012-04-05	Bern	Bern	Vechigen	EFB	1	0
2012-05-02	Bern	Bern	Vechigen	EFB	1	0
2012-05-07	Bern	Bern	Köniz	EFB	1	0
2012-05-08	Bern	Bern	Vechigen	EFB	1	0
2012-05-31	Bern	Bern	Vechigen	EFB	1	0
2016-05-18	Bern	Bern	Köniz	EFB	1	0
2009-05-08	Bern	Bern-Mittelland	Kiesen	EFB	1	0
2009-07-08	Bern	Bern-Mittelland	Oberhünigen	EFB	1	0
2009-08-12	Bern	Bern-Mittelland	Kiesen	EFB	1	0
2010-04-19	Bern	Bern-Mittelland	Kiesen	EFB	1	0
2010-04-26	Bern	Bern-Mittelland	Wichtrach	EFB	1	0
2010-05-26	Bern	Bern-Mittelland	Münsingen	EFB	1	0
2010-05-31	Bern	Bern-Mittelland	Mirchel	EFB	1	0
2010-06-10	Bern	Bern-Mittelland	Worb	EFB	1	0
2010-06-22	Bern	Bern-Mittelland	Schwarzenburg	EFB	1	0
2010-06-28	Bern	Bern-Mittelland	Oberdiessbach	EFB	1	0
2010-07-01	Bern	Bern-Mittelland	Oberdiessbach	EFB	1	0
2010-07-01	Bern	Bern-Mittelland	Oberdiessbach	EFB	1	0
2010-07-05	Bern	Bern-Mittelland	Bowil	EFB	1	0
2010-07-13	Bern	Bern-Mittelland	Arni (BE)	EFB	1	0
2010-07-19	Bern	Bern-Mittelland	Oberdiessbach	EFB	1	0
2010-08-12	Bern	Bern-Mittelland	Oberdiessbach	EFB	1	0
2010-08-16	Bern	Bern-Mittelland	Jaberg	EFB	1	0
2010-08-27	Bern	Bern-Mittelland	Wichtrach	EFB	1	0
2010-08-27	Bern	Bern-Mittelland	Bowil	EFB	1	0
2011-03-28	Bern	Bern-Mittelland	Wichtrach	EFB	1	0
2011-04-28	Bern	Bern-Mittelland	Riggisberg	EFB	1	0
2011-05-09	Bern	Bern-Mittelland	Bowil	EFB	1	0
2011-05-27	Bern	Bern-Mittelland	Wichtrach	EFB	1	0
2011-06-06	Bern	Bern-Mittelland	Gelterfingen	EFB	1	0
2011-06-27	Bern	Bern-Mittelland	Oberdiessbach	EFB	1	0
2011-08-15	Bern	Bern-Mittelland	Bowil	EFB	1	0
2012-04-02	Bern	Bern-Mittelland	Wichtrach	EFB	1	0
2012-04-30	Bern	Bern-Mittelland	Riggisberg	EFB	1	0
2012-05-03	Bern	Bern-Mittelland	Schwarzenburg	EFB	1	0
2012-05-03	Bern	Bern-Mittelland	Worb	EFB	1	0
2012-05-07	Bern	Bern-Mittelland	Wichtrach	EFB	1	0
2012-05-07	Bern	Bern-Mittelland	Tägertschi	EFB	1	0
2012-05-24	Bern	Bern-Mittelland	Vechigen	EFB	1	0
2012-05-25	Bern	Bern-Mittelland	Oberdiessbach	EFB	1	0
2012-05-31	Bern	Bern-Mittelland	Bowil	EFB	1	0
2012-06-01	Bern	Bern-Mittelland	Bäriswil	EFB	1	0
2012-06-04	Bern	Bern-Mittelland	Oberdiessbach	EFB	1	0
2012-06-05	Bern	Bern-Mittelland	Trimstein	EFB	1	0
2012-06-05	Bern	Bern-Mittelland	Linden	EFB	1	0
2012-06-07	Bern	Bern-Mittelland	Konolfingen	EFB	1	0
2012-06-07	Bern	Bern-Mittelland	Tägertschi	EFB	1	0
2012-06-07	Bern	Bern-Mittelland	Oberhünigen	EFB	1	0
2012-06-07	Bern	Bern-Mittelland	Trimstein	EFB	1	0
2012-06-18	Bern	Bern-Mittelland	Köniz	EFB	1	0
2012-06-19	Bern	Bern-Mittelland	Neuenegg	EFB	1	0
2012-06-19	Bern	Bern-Mittelland	Kiesen	EFB	1	0
2012-06-21	Bern	Bern-Mittelland	Neuenegg	EFB	1	0
2012-06-21	Bern	Bern-Mittelland	Kehrsatz	EFB	1	0
2012-06-21	Bern	Bern-Mittelland	Vechigen	EFB	1	0
2012-06-21	Bern	Bern-Mittelland	Arni (BE)	EFB	1	0
2012-06-26	Bern	Bern-Mittelland	Bolligen	EFB	1	0
2012-06-26	Bern	Bern-Mittelland	Köniz	EFB	1	0
2012-07-10	Bern	Bern-Mittelland	Oberdiessbach	EFB	1	0
2012-07-10	Bern	Bern-Mittelland	Konolfingen	EFB	1	0
2012-07-10	Bern	Bern-Mittelland	Walkringen	EFB	1	0
2012-07-17	Bern	Bern-Mittelland	Bolligen	EFB	1	0
2012-08-31	Bern	Bern-Mittelland	Bolligen	EFB	1	0
2012-08-31	Bern	Bern-Mittelland	Arni (BE)	EFB	1	0
2012-08-31	Bern	Bern-Mittelland	Neuenegg	EFB	1	0
2012-10-22	Bern	Bern-Mittelland	Rümligen	EFB	1	0
2013-05-14	Bern	Bern-Mittelland	Münchenbuchsee	AFB	1	0
2013-05-14	Bern	Bern-Mittelland	Münchenbuchsee	AFB	1	0
2013-05-14	Bern	Bern-Mittelland	Mülchi	AFB	1	0
2013-05-14	Bern	Bern-Mittelland	Münchenbuchsee	EFB	1	0
2013-05-14	Bern	Bern-Mittelland	Münchenbuchsee	EFB	1	0
2013-05-14	Bern	Bern-Mittelland	Allmendingen	EFB	1	0
2013-05-14	Bern	Bern-Mittelland	Wichtrach	EFB	1	0
2013-05-14	Bern	Bern-Mittelland	Münchenbuchsee	EFB	1	0
2013-05-14	Bern	Bern-Mittelland	Mattstetten	EFB	1	0
2013-05-14	Bern	Bern-Mittelland	Mattstetten	EFB	1	0
2013-05-14	Bern	Bern-Mittelland	Münsingen	EFB	1	0
2013-05-14	Bern	Bern-Mittelland	Walkringen	EFB	1	0
2013-05-21	Bern	Bern-Mittelland	Mülchi	AFB	1	0
2013-05-21	Bern	Bern-Mittelland	Büren zum Hof	AFB	1	0
2013-05-21	Bern	Bern-Mittelland	Wohlen bei Bern	EFB	1	0
2013-05-21	Bern	Bern-Mittelland	Worb	EFB	1	0
2013-05-21	Bern	Bern-Mittelland	Bowil	EFB	1	0
2013-05-21	Bern	Bern-Mittelland	Mirchel	EFB	1	0
2013-05-21	Bern	Bern-Mittelland	Tägertschi	EFB	1	0
2013-05-21	Bern	Bern-Mittelland	Walkringen	EFB	1	0
2013-05-21	Bern	Bern-Mittelland	Vechigen	EFB	1	0
2013-05-21	Bern	Bern-Mittelland	Wichtrach	EFB	1	0
2013-05-21	Bern	Bern-Mittelland	Jaberg	EFB	1	0
2013-05-21	Bern	Bern-Mittelland	Kirchdorf (BE)	EFB	1	0
2013-05-21	Bern	Bern-Mittelland	Gelterfingen	EFB	1	0
2013-05-21	Bern	Bern-Mittelland	Rubigen	EFB	1	0
2013-05-21	Bern	Bern-Mittelland	Wiggiswil	EFB	1	0
2013-05-21	Bern	Bern-Mittelland	Schwarzenburg	EFB	1	0
2013-05-21	Bern	Bern-Mittelland	Etzelkofen	EFB	1	0
2013-05-21	Bern	Bern-Mittelland	Linden	EFB	1	0
2013-05-31	Bern	Bern-Mittelland	Moosseedorf	EFB	1	0
2013-05-31	Bern	Bern-Mittelland	Gelterfingen	EFB	1	0
2013-05-31	Bern	Bern-Mittelland	Oberdiessbach	EFB	1	0
2013-05-31	Bern	Bern-Mittelland	Vechigen	EFB	1	0
2013-06-11	Bern	Bern-Mittelland	Landiswil	EFB	1	0
2013-06-11	Bern	Bern-Mittelland	Wichtrach	EFB	1	0
2013-06-11	Bern	Bern-Mittelland	Neuenegg	EFB	1	0
2013-06-11	Bern	Bern-Mittelland	Mirchel	EFB	1	0
2013-06-11	Bern	Bern-Mittelland	Wichtrach	EFB	1	0
2013-06-11	Bern	Bern-Mittelland	Freimettigen	EFB	1	0
2013-07-04	Bern	Bern-Mittelland	Oppligen	EFB	1	0
2013-07-04	Bern	Bern-Mittelland	Oberdiessbach	EFB	1	0
2013-07-04	Bern	Bern-Mittelland	Riggisberg	EFB	1	0
2013-07-04	Bern	Bern-Mittelland	Walkringen	EFB	1	0
2013-07-04	Bern	Bern-Mittelland	Kiesen	EFB	1	0
2013-07-04	Bern	Bern-Mittelland	Riggisberg	EFB	1	0
2013-07-04	Bern	Bern-Mittelland	Landiswil	EFB	1	0
2013-07-04	Bern	Bern-Mittelland	Köniz	EFB	1	0
2013-07-04	Bern	Bern-Mittelland	Bowil	EFB	1	0
2013-07-19	Bern	Bern-Mittelland	Oberdiessbach	EFB	1	0
2013-07-19	Bern	Bern-Mittelland	Moosseedorf	EFB	1	0
2013-07-19	Bern	Bern-Mittelland	Oberhünigen	EFB	1	0
2013-07-29	Bern	Bern-Mittelland	Münchenbuchsee	EFB	1	0
2013-07-29	Bern	Bern-Mittelland	Bowil	EFB	1	0
2013-07-29	Bern	Bern-Mittelland	Walkringen	EFB	1	0
2013-08-14	Bern	Bern-Mittelland	Walkringen	EFB	1	0
2013-08-14	Bern	Bern-Mittelland	Bowil	EFB	1	0
2013-08-14	Bern	Bern-Mittelland	Bleiken bei Oberdiessbach	EFB	1	0
2014-06-20	Bern	Bern-Mittelland	Walkringen	AFB	1	0
2014-06-20	Bern	Bern-Mittelland	Wichtrach	EFB	1	0
2014-06-20	Bern	Bern-Mittelland	Riggisberg	EFB	1	0
2014-06-23	Bern	Bern-Mittelland	Vechigen	AFB	1	0
2014-06-23	Bern	Bern-Mittelland	Belp	EFB	1	0
2014-06-23	Bern	Bern-Mittelland	Freimettigen	EFB	1	0
2014-06-23	Bern	Bern-Mittelland	Gelterfingen	EFB	1	0
2014-06-23	Bern	Bern-Mittelland	Kehrsatz	EFB	1	0
2014-06-23	Bern	Bern-Mittelland	Riggisberg	EFB	1	0
2014-06-23	Bern	Bern-Mittelland	Kehrsatz	EFB	1	0
2014-06-23	Bern	Bern-Mittelland	Fraubrunnen	EFB	1	0
2014-06-23	Bern	Bern-Mittelland	Konolfingen	EFB	1	0
2014-06-23	Bern	Bern-Mittelland	Bowil	EFB	1	0
2014-06-23	Bern	Bern-Mittelland	Kehrsatz	EFB	1	0
2014-06-23	Bern	Bern-Mittelland	Mühledorf (BE)	EFB	1	0
2014-06-23	Bern	Bern-Mittelland	Moosseedorf	EFB	1	0
2014-06-23	Bern	Bern-Mittelland	Mirchel	EFB	1	0
2014-06-23	Bern	Bern-Mittelland	Oberdiessbach	EFB	1	0
2014-06-23	Bern	Bern-Mittelland	Konolfingen	EFB	1	0
2014-06-23	Bern	Bern-Mittelland	Tägertschi	EFB	1	0
2014-06-23	Bern	Bern-Mittelland	Wichtrach	EFB	1	0
2014-06-23	Bern	Bern-Mittelland	Gelterfingen	EFB	1	0
2014-06-24	Bern	Bern-Mittelland	Riggisberg	EFB	1	0
2014-06-24	Bern	Bern-Mittelland	Oberdiessbach	EFB	1	0
2014-06-24	Bern	Bern-Mittelland	Mirchel	EFB	1	0
2014-06-24	Bern	Bern-Mittelland	Freimettigen	EFB	1	0
2014-06-24	Bern	Bern-Mittelland	Oberhünigen	EFB	1	0
2014-06-24	Bern	Bern-Mittelland	Arni (BE)	EFB	1	0
2014-07-28	Bern	Bern-Mittelland	Bowil	EFB	1	0
2014-07-28	Bern	Bern-Mittelland	Oberdiessbach	EFB	1	0
2014-07-28	Bern	Bern-Mittelland	Worb	EFB	1	0
2014-08-21	Bern	Bern-Mittelland	Köniz	EFB	1	0
2014-08-21	Bern	Bern-Mittelland	Worb	EFB	1	0
2015-04-20	Bern	Bern-Mittelland	Walkringen	EFB	1	0
2015-04-20	Bern	Bern-Mittelland	Oberdiessbach	EFB	1	0
2015-04-20	Bern	Bern-Mittelland	Vechigen	EFB	1	0
2015-04-21	Bern	Bern-Mittelland	Jegenstorf	EFB	1	0
2015-04-22	Bern	Bern-Mittelland	Wichtrach	EFB	1	0
2015-04-23	Bern	Bern-Mittelland	Mühledorf (BE)	EFB	1	0
2015-04-29	Bern	Bern-Mittelland	Vechigen	AFB	1	0
2015-04-29	Bern	Bern-Mittelland	Walkringen	EFB	1	0
2015-05-04	Bern	Bern-Mittelland	Konolfingen	EFB	1	0
2015-05-06	Bern	Bern-Mittelland	Oberdiessbach	EFB	1	0
2015-05-07	Bern	Bern-Mittelland	Oberdiessbach	EFB	1	0
2015-05-08	Bern	Bern-Mittelland	Rümligen	EFB	1	0
2015-05-08	Bern	Bern-Mittelland	Oberdiessbach	EFB	1	0
2015-05-11	Bern	Bern-Mittelland	Niederhünigen	EFB	1	0
2015-05-13	Bern	Bern-Mittelland	Moosseedorf	EFB	1	0
2015-05-18	Bern	Bern-Mittelland	Worb	EFB	1	0
2015-05-18	Bern	Bern-Mittelland	Vechigen	EFB	1	0
2015-05-19	Bern	Bern-Mittelland	Linden	EFB	1	0
2015-05-26	Bern	Bern-Mittelland	Worb	EFB	1	0
2015-05-26	Bern	Bern-Mittelland	Köniz	EFB	1	0
2015-05-28	Bern	Bern-Mittelland	Oberdiessbach	EFB	1	0
2015-06-03	Bern	Bern-Mittelland	Worb	EFB	1	0
2015-06-05	Bern	Bern-Mittelland	Zäziwil	EFB	1	0
2015-06-10	Bern	Bern-Mittelland	Linden	EFB	1	0
2015-06-11	Bern	Bern-Mittelland	Oberbalm	EFB	1	0
2015-06-15	Bern	Bern-Mittelland	Walkringen	EFB	1	0
2015-06-15	Bern	Bern-Mittelland	Vechigen	EFB	1	0
2015-06-16	Bern	Bern-Mittelland	Bowil	EFB	1	0
2015-06-18	Bern	Bern-Mittelland	Arni (BE)	EFB	1	0
2015-06-22	Bern	Bern-Mittelland	Oberbalm	EFB	1	0
2015-07-02	Bern	Bern-Mittelland	Moosseedorf	AFB	1	0
2015-07-08	Bern	Bern-Mittelland	Wohlen bei Bern	EFB	1	0
2015-07-10	Bern	Bern-Mittelland	Oberdiessbach	EFB	1	0
2015-07-14	Bern	Bern-Mittelland	Münchenbuchsee	EFB	1	0
2016-04-07	Bern	Bern-Mittelland	Vechigen	EFB	1	0
2016-04-13	Bern	Bern-Mittelland	Gelterfingen	EFB	1	0
2016-04-19	Bern	Bern-Mittelland	Köniz	EFB	1	0
2016-04-21	Bern	Bern-Mittelland	Münsingen	EFB	1	0
2016-05-09	Bern	Bern-Mittelland	Mülchi	EFB	1	0
2016-05-12	Bern	Bern-Mittelland	Linden	EFB	1	0
2016-05-12	Bern	Bern-Mittelland	Vechigen	EFB	1	0
2016-05-23	Bern	Bern-Mittelland	Oberdiessbach	EFB	1	0
2016-06-02	Bern	Bern-Mittelland	Münchenbuchsee	AFB	1	0
2016-06-15	Bern	Bern-Mittelland	Oberthal	EFB	1	0
2016-06-20	Bern	Bern-Mittelland	Mirchel	EFB	1	0
2016-07-05	Bern	Bern-Mittelland	Linden	EFB	1	0
2016-07-05	Bern	Bern-Mittelland	Oppligen	EFB	1	0
2016-07-08	Bern	Bern-Mittelland	Linden	EFB	1	0
2016-07-10	Bern	Bern-Mittelland	Kiesen	EFB	1	0
2016-07-11	Bern	Bern-Mittelland	Landiswil	EFB	1	0
2016-07-27	Bern	Bern-Mittelland	Mühlethurnen	EFB	1	0
2016-08-02	Bern	Bern-Mittelland	Oberbalm	EFB	1	0
2016-08-12	Bern	Bern-Mittelland	Walkringen	EFB	1	0
2016-08-24	Bern	Bern-Mittelland	Bowil	EFB	1	0
2016-09-13	Bern	Bern-Mittelland	Wohlen bei Bern	EFB	1	0
2016-09-13	Bern	Bern-Mittelland	Wohlen bei Bern	EFB	1	0
2005-09-08	Graubünden	Bernina	Poschiavo	AFB	1	0
2010-07-27	Graubünden	Bernina	Brusio	EFB	2	2
2011-04-21	Graubünden	Bernina	Poschiavo	AFB	1	1
2011-04-23	Graubünden	Bernina	Poschiavo	EFB	2	2
2011-05-19	Graubünden	Bernina	Poschiavo	AFB	1	2
2011-09-06	Graubünden	Bernina	Poschiavo	Varroa destructor	1	0
2011-09-23	Graubünden	Bernina	Poschiavo	Varroa destructor	1	0
2011-10-11	Graubünden	Bernina	Brusio	AFB	1	1
2011-10-11	Graubünden	Bernina	Poschiavo	Varroa destructor	1	1
2011-10-20	Graubünden	Bernina	Brusio	Varroa destructor	2	0
2012-05-18	Graubünden	Bernina	Poschiavo	AFB	1	1
2012-06-05	Graubünden	Bernina	Poschiavo	AFB	2	2
2012-06-11	Graubünden	Bernina	Poschiavo	AFB	3	4
2012-06-20	Graubünden	Bernina	Poschiavo	AFB	1	1
2012-08-30	Graubünden	Bernina	Poschiavo	AFB	1	0
2013-08-23	Graubünden	Bernina	Poschiavo	AFB	1	1
2013-10-16	Graubünden	Bernina	Poschiavo	AFB	1	1
2014-05-06	Graubünden	Bernina	Poschiavo	AFB	1	0
2014-05-13	Graubünden	Bernina	Poschiavo	AFB	1	0
2014-05-13	Graubünden	Bernina	Poschiavo	EFB	1	0
2014-05-28	Graubünden	Bernina	Poschiavo	EFB	2	0
2014-10-07	Graubünden	Bernina	Brusio	AFB	1	1
2014-10-07	Graubünden	Bernina	Poschiavo	AFB	1	1
2015-05-13	Graubünden	Bernina	Brusio	AFB	1	1
2015-05-20	Graubünden	Bernina	Poschiavo	AFB	1	1
2015-05-20	Graubünden	Bernina	Brusio	AFB	2	2
2015-07-27	Graubünden	Bernina	Brusio	EFB	1	1
1991-06-15	Graubünden	Bernina (bis 2007)		AFB	0	0
1991-08-15	Graubünden	Bernina (bis 2007)		AFB	0	0
1991-09-15	Graubünden	Bernina (bis 2007)		EFB	0	0
1992-06-15	Graubünden	Bernina (bis 2007)		AFB	0	0
1992-07-15	Graubünden	Bernina (bis 2007)		AFB	0	0
1992-09-15	Graubünden	Bernina (bis 2007)		AFB	0	0
1993-04-15	Graubünden	Bernina (bis 2007)		AFB	0	0
1993-04-15	Graubünden	Bernina (bis 2007)		AFB	0	0
1993-04-15	Graubünden	Bernina (bis 2007)		AFB	0	0
1993-05-15	Graubünden	Bernina (bis 2007)		AFB	0	0
1993-05-15	Graubünden	Bernina (bis 2007)		AFB	0	0
1993-05-15	Graubünden	Bernina (bis 2007)		AFB	0	0
1993-06-15	Graubünden	Bernina (bis 2007)		AFB	0	0
1993-06-15	Graubünden	Bernina (bis 2007)		AFB	0	0
1993-09-15	Graubünden	Bernina (bis 2007)		AFB	0	0
1993-09-15	Graubünden	Bernina (bis 2007)		AFB	0	0
1993-09-15	Graubünden	Bernina (bis 2007)		AFB	0	0
1994-07-15	Graubünden	Bernina (bis 2007)		AFB	0	0
1994-09-15	Graubünden	Bernina (bis 2007)		AFB	0	0
1995-07-15	Graubünden	Bernina (bis 2007)		AFB	0	0
1998-06-20	Graubünden	Bernina (bis 2007)	Brusio	AFB	0	0
1998-06-24	Graubünden	Bernina (bis 2007)	Poschiavo	AFB	2	2
1998-10-30	Graubünden	Bernina (bis 2007)	Poschiavo	AFB	3	0
1999-06-07	Graubünden	Bernina (bis 2007)	Poschiavo	AFB	2	2
1999-06-14	Graubünden	Bernina (bis 2007)	Poschiavo	EFB	1	0
1999-06-18	Graubünden	Bernina (bis 2007)	Brusio	AFB	6	0
1999-08-10	Graubünden	Bernina (bis 2007)	Poschiavo	AFB	3	0
1999-08-20	Graubünden	Bernina (bis 2007)	Brusio	AFB	1	0
1999-08-20	Graubünden	Bernina (bis 2007)	Brusio	AFB	1	0
1999-09-03	Graubünden	Bernina (bis 2007)	Poschiavo	AFB	1	0
1999-10-12	Graubünden	Bernina (bis 2007)	Poschiavo	AFB	1	0
2000-05-08	Graubünden	Bernina (bis 2007)	Poschiavo	AFB	1	0
2000-06-29	Graubünden	Bernina (bis 2007)	Poschiavo	AFB	1	0
2000-08-08	Graubünden	Bernina (bis 2007)	Poschiavo	AFB	1	0
2001-04-28	Graubünden	Bernina (bis 2007)	Brusio	AFB	3	0
2001-05-23	Graubünden	Bernina (bis 2007)	Poschiavo	AFB	7	7
2001-08-24	Graubünden	Bernina (bis 2007)	Poschiavo	AFB	1	1
2001-08-24	Graubünden	Bernina (bis 2007)	Brusio	AFB	1	1
2001-08-24	Graubünden	Bernina (bis 2007)	Poschiavo	EFB	1	1
2001-09-03	Graubünden	Bernina (bis 2007)	Poschiavo	AFB	1	0
2001-09-03	Graubünden	Bernina (bis 2007)	Poschiavo	AFB	2	0
2001-09-03	Graubünden	Bernina (bis 2007)	Brusio	AFB	1	0
2002-04-26	Graubünden	Bernina (bis 2007)	Poschiavo	AFB	5	5
2002-05-24	Graubünden	Bernina (bis 2007)	Poschiavo	EFB	1	0
2002-06-19	Graubünden	Bernina (bis 2007)	Poschiavo	EFB	1	1
2002-06-19	Graubünden	Bernina (bis 2007)	Poschiavo	EFB	9	9
2002-09-05	Graubünden	Bernina (bis 2007)	Poschiavo	AFB	6	0
2002-09-05	Graubünden	Bernina (bis 2007)	Poschiavo	AFB	1	0
2002-09-05	Graubünden	Bernina (bis 2007)	Poschiavo	AFB	7	0
2002-09-05	Graubünden	Bernina (bis 2007)	Brusio	AFB	3	0
2002-09-05	Graubünden	Bernina (bis 2007)	Brusio	AFB	12	0
2002-09-05	Graubünden	Bernina (bis 2007)	Brusio	AFB	7	0
2002-11-08	Graubünden	Bernina (bis 2007)	Brusio	AFB	1	0
2003-05-07	Graubünden	Bernina (bis 2007)	Poschiavo	EFB	1	0
2003-05-16	Graubünden	Bernina (bis 2007)	Poschiavo	EFB	1	0
2004-09-10	Graubünden	Bernina (bis 2007)	Brusio	AFB	1	0
2005-06-20	Graubünden	Bernina (bis 2007)	Poschiavo	AFB	1	0
2005-08-11	Graubünden	Bernina (bis 2007)	Brusio	AFB	1	0
2005-08-11	Graubünden	Bernina (bis 2007)	Poschiavo	AFB	1	0
2005-08-18	Graubünden	Bernina (bis 2007)	Poschiavo	EFB	1	0
2005-09-05	Graubünden	Bernina (bis 2007)	Poschiavo	AFB	1	0
2005-09-05	Graubünden	Bernina (bis 2007)	Brusio	AFB	1	0
2005-09-05	Graubünden	Bernina (bis 2007)	Poschiavo	AFB	1	0
2005-09-05	Graubünden	Bernina (bis 2007)	Poschiavo	AFB	1	0
2005-09-12	Graubünden	Bernina (bis 2007)	Brusio	AFB	1	0
2006-04-12	Graubünden	Bernina (bis 2007)	Poschiavo	AFB	1	0
2006-05-16	Graubünden	Bernina (bis 2007)	Poschiavo	AFB	1	0
2006-05-25	Graubünden	Bernina (bis 2007)	Poschiavo	AFB	1	0
2006-05-26	Graubünden	Bernina (bis 2007)	Poschiavo	AFB	1	0
2006-05-26	Graubünden	Bernina (bis 2007)	Poschiavo	EFB	1	0
2006-05-31	Graubünden	Bernina (bis 2007)	Poschiavo	AFB	1	0
2006-06-06	Graubünden	Bernina (bis 2007)	Poschiavo	AFB	1	0
2006-07-05	Graubünden	Bernina (bis 2007)	Poschiavo	AFB	2	0
2006-08-18	Graubünden	Bernina (bis 2007)	Poschiavo	AFB	3	3
2007-07-12	Graubünden	Bernina (bis 2007)	Poschiavo	AFB	1	1
2007-08-07	Graubünden	Bernina (bis 2007)	Poschiavo	EFB	2	0
2007-08-07	Graubünden	Bernina (bis 2007)	Poschiavo	Varroa destructor	1	0
2007-10-16	Graubünden	Bernina (bis 2007)	Poschiavo	EFB	1	0
2008-04-04	Graubünden	Bernina (bis 2007)	Poschiavo	AFB	0	0
2008-05-15	Graubünden	Bernina (bis 2007)	Poschiavo	AFB	0	0
2008-11-13	Graubünden	Bernina (bis 2007)	Brusio	AFB	1	1
2010-09-06	Graubünden	Bernina (bis 2007)	Poschiavo	EFB	1	1
2010-11-10	Graubünden	Bernina (bis 2007)	Brusio	AFB	8	8
2011-04-27	Graubünden	Bernina (bis 2007)	Brusio	EFB	1	1
1999-04-24	Bern	Biel	Biel (BE)	AFB	2	0
1999-04-24	Bern	Biel	Biel (BE)	AFB	2	0
1999-05-01	Bern	Biel	Biel (BE)	AFB	0	0
1999-05-01	Bern	Biel	Biel (BE)	AFB	0	0
1999-05-01	Bern	Biel	Biel (BE)	EFB	0	0
1999-05-08	Bern	Biel	Biel (BE)	AFB	0	0
1999-05-15	Bern	Biel	Biel (BE)	AFB	0	0
1999-05-29	Bern	Biel	Biel (BE)	AFB	1	0
2000-05-15	Bern	Biel	Evilard	AFB	0	0
2001-07-14	Bern	Biel	Evilard	AFB	1	0
2001-07-28	Bern	Biel	Evilard	AFB	1	0
2001-07-28	Bern	Biel	Biel (BE)	EFB	1	0
2002-11-11	Bern	Biel	Biel (BE)	EFB	2	0
2003-05-11	Bern	Biel	Aegerten	EFB	2	0
2005-05-21	Bern	Biel	Biel (BE)	EFB	17	0
2005-05-28	Bern	Biel	Biel (BE)	EFB	6	0
2005-06-02	Bern	Biel	Biel (BE)	EFB	2	0
2010-06-02	Bern	Biel	Biel (BE)	EFB	1	0
2011-04-26	Bern	Biel	Biel (BE)	AFB	1	0
2011-04-26	Bern	Biel	Biel (BE)	EFB	1	0
2011-08-15	Bern	Biel	Biel (BE)	EFB	1	0
2012-03-05	Bern	Biel	Biel (BE)	EFB	1	0
2010-05-28	Bern	Biel/Bienne	Twann-Tüscherz	EFB	1	0
2012-04-20	Bern	Biel/Bienne	Brügg	EFB	1	0
2012-08-31	Bern	Biel/Bienne	Twann	AFB	1	0
2013-05-31	Bern	Biel/Bienne	Brügg	EFB	1	0
2013-06-11	Bern	Biel/Bienne	Bellmund	EFB	1	0
2013-07-29	Bern	Biel/Bienne	Twann-Tüscherz	EFB	1	0
2014-06-23	Bern	Biel/Bienne	Twann-Tüscherz	EFB	1	0
2014-10-31	Bern	Biel/Bienne	Biel (BE)	EFB	1	0
2015-05-13	Bern	Biel/Bienne	Biel (BE)	EFB	1	0
2015-06-01	Bern	Biel/Bienne	Twann-Tüscherz	EFB	1	0
2016-04-25	Bern	Biel/Bienne	Mörigen	EFB	1	0
2016-05-10	Bern	Biel/Bienne	Mörigen	EFB	1	0
2016-08-12	Bern	Biel/Bienne	Mörigen	EFB	1	0
1992-04-15	Thurgau	Bischofszell		AFB	0	0
1992-05-15	Thurgau	Bischofszell		AFB	0	0
1995-04-15	Thurgau	Bischofszell	Neukirch an der Thur (bis ???)	Varroa destructor	0	0
1995-04-15	Thurgau	Bischofszell	Neukirch an der Thur (bis ???)	Varroa destructor	0	0
2003-10-01	Thurgau	Bischofszell	Sulgen	AFB	0	0
2009-08-03	Thurgau	Bischofszell	Amriswil	EFB	1	0
2009-08-03	Thurgau	Bischofszell	Amriswil	EFB	1	0
2009-08-10	Thurgau	Bischofszell	Amriswil	EFB	1	0
2009-09-03	Thurgau	Bischofszell	Amriswil	EFB	1	0
2010-01-28	Thurgau	Bischofszell	Kradolf-Schönenberg	EFB	9	9
2010-03-25	Thurgau	Bischofszell	Amriswil	EFB	1	0
2010-04-22	Thurgau	Bischofszell	Amriswil	EFB	1	0
2010-05-03	Thurgau	Bischofszell	Amriswil	EFB	1	0
2010-08-17	Thurgau	Bischofszell	Amriswil	EFB	3	0
2010-08-17	Thurgau	Bischofszell	Amriswil	EFB	5	0
2010-08-17	Thurgau	Bischofszell	Amriswil	EFB	1	0
2012-04-30	Thurgau	Bischofszell	Sulgen	EFB	2	0
2012-04-30	Thurgau	Bischofszell	Kradolf-Schönenberg	EFB	1	0
2012-07-19	Thurgau	Bischofszell	Kradolf-Schönenberg	EFB	1	0
2015-07-24	Thurgau	Bischofszell	Amriswil	EFB	1	1
2016-07-13	Thurgau	Bischofszell	Hauptwil-Gottshaus	EFB	2	2
2016-08-02	Thurgau	Bischofszell	Hauptwil-Gottshaus	EFB	1	1
1998-08-14	Tessin	Blenio	Corzoneso	AFB	6	6
2004-03-19	Tessin	Blenio	Dongio	AFB	1	1
2005-10-27	Tessin	Blenio	Malvaglia	AFB	1	1
2011-07-06	Tessin	Blenio	Blenio	AFB	2	2
2013-02-19	Tessin	Blenio	Blenio	AFB	1	2
2016-06-08	Tessin	Blenio	Malvaglia	AFB	6	6
2016-06-08	Tessin	Blenio	Malvaglia	EFB	1	0
1993-06-15	Neuenburg	Boudry		AFB	0	0
1997-05-15	Neuenburg	Boudry	Bevaix	EFB	0	0
1998-02-28	Neuenburg	Boudry	Boudry	Varroa destructor	0	0
1999-03-13	Neuenburg	Boudry	Gorgier	Varroa destructor	0	0
1999-03-20	Neuenburg	Boudry	Saint-Aubin-Sauges	Varroa destructor	0	0
2010-05-04	Neuenburg	Boudry	Brot-Dessous	AFB	2	2
1991-05-15	Aargau	Bremgarten		AFB	0	0
1991-06-15	Aargau	Bremgarten		AFB	0	0
1992-04-15	Aargau	Bremgarten		AFB	0	0
1992-05-15	Aargau	Bremgarten		EFB	0	0
1994-04-15	Aargau	Bremgarten		AFB	0	17
1994-05-15	Aargau	Bremgarten		AFB	0	3
1994-06-15	Aargau	Bremgarten		AFB	0	1
1997-08-15	Aargau	Bremgarten	Büttikon	AFB	0	0
2004-08-25	Aargau	Bremgarten	Jonen	AFB	1	0
2004-09-08	Aargau	Bremgarten	Jonen	AFB	1	0
2005-10-10	Aargau	Bremgarten	Rudolfstetten-Friedlisberg	AFB	0	3
2005-10-19	Aargau	Bremgarten	Rudolfstetten-Friedlisberg	AFB	0	3
2005-10-26	Aargau	Bremgarten	Rudolfstetten-Friedlisberg	AFB	0	1
2010-06-17	Aargau	Bremgarten	Dottikon	EFB	2	2
2010-09-29	Aargau	Bremgarten	Eggenwil	EFB	2	4
2011-04-29	Aargau	Bremgarten	Wohlen (AG)	EFB	1	0
2011-09-27	Aargau	Bremgarten	Oberlunkhofen	AFB	5	5
1992-09-15	Wallis	Brig		AFB	0	0
1995-05-15	Wallis	Brig		AFB	0	0
1995-05-15	Wallis	Brig		AFB	0	0
1995-05-15	Wallis	Brig		AFB	0	0
1995-05-15	Wallis	Brig		AFB	0	0
2001-02-15	Wallis	Brig	Brig-Glis	AFB	6	0
2003-08-22	Wallis	Brig	Ried bei Brig	AFB	11	0
2003-09-01	Wallis	Brig	Ried bei Brig	AFB	2	0
2006-05-22	Wallis	Brig	Naters	EFB	4	0
2006-06-07	Wallis	Brig	Ried bei Brig	EFB	13	0
2008-05-08	Wallis	Brig	Ried bei Brig	EFB	2	0
2008-05-13	Wallis	Brig	Ried bei Brig	EFB	5	0
2008-05-21	Wallis	Brig	Naters	EFB	1	0
2008-05-21	Wallis	Brig	Brig-Glis	EFB	3	0
2008-05-21	Wallis	Brig	Naters	EFB	4	0
2008-05-22	Wallis	Brig	Ried bei Brig	EFB	2	0
2008-05-22	Wallis	Brig	Naters	EFB	1	0
2008-07-24	Wallis	Brig	Naters	EFB	1	0
2008-10-10	Wallis	Brig	Naters	AFB	2	0
2009-04-01	Wallis	Brig	Ried bei Brig	Varroa destructor	80	0
2009-05-16	Wallis	Brig	Ried bei Brig	EFB	4	4
2009-05-19	Wallis	Brig	Brig-Glis	EFB	7	7
2009-05-19	Wallis	Brig	Brig-Glis	EFB	4	4
2009-05-19	Wallis	Brig	Brig-Glis	EFB	2	2
2009-05-28	Wallis	Brig	Ried bei Brig	EFB	1	1
2009-05-28	Wallis	Brig	Naters	EFB	16	16
2009-05-28	Wallis	Brig	Brig-Glis	EFB	8	8
2009-05-28	Wallis	Brig	Naters	EFB	3	3
2009-06-05	Wallis	Brig	Brig-Glis	EFB	4	4
2009-06-10	Wallis	Brig	Brig-Glis	EFB	1	1
2009-06-10	Wallis	Brig	Brig-Glis	EFB	1	1
2009-06-11	Wallis	Brig	Naters	EFB	5	5
2010-06-21	Wallis	Brig	Brig-Glis	EFB	9	0
2011-04-27	Wallis	Brig	Naters	EFB	7	7
2011-05-06	Wallis	Brig	Termen	EFB	1	1
2011-05-06	Wallis	Brig	Brig-Glis	EFB	1	1
2011-05-06	Wallis	Brig	Brig-Glis	EFB	4	4
2011-05-06	Wallis	Brig	Naters	EFB	0	2
2012-06-06	Wallis	Brig	Brig-Glis	EFB	2	2
2012-06-14	Wallis	Brig	Naters	EFB	5	5
2013-09-20	Wallis	Brig	Brig-Glis	AFB	14	14
2013-09-20	Wallis	Brig	Brig-Glis	AFB	25	25
2013-09-20	Wallis	Brig	Brig-Glis	AFB	9	15
2013-09-20	Wallis	Brig	Brig-Glis	AFB	1	1
2013-12-01	Waadt	Broye-Vully	Avenches	Varroa destructor	1	0
1995-04-15	Aargau	Brugg	Thalheim (AG)	AFB	0	4
2003-08-11	Aargau	Brugg	Bözen	AFB	1	1
2005-07-15	Aargau	Brugg	Auenstein	AFB	1	0
2007-08-07	Aargau	Brugg	Veltheim (AG)	AFB	6	9
2008-07-04	Aargau	Brugg	Riniken	AFB	3	8
2012-05-01	Aargau	Brugg	Gallenkirch	AFB	19	19
2012-05-22	Aargau	Brugg	Bözen	AFB	3	3
2012-10-12	Aargau	Brugg	Bözberg	AFB	1	3
2013-04-23	Aargau	Brugg	Effingen	AFB	1	2
2013-05-31	Aargau	Brugg	Gallenkirch	AFB	1	1
2013-06-07	Aargau	Brugg	Effingen	AFB	1	1
2014-04-15	Aargau	Brugg	Bözberg	AFB	2	2
2014-04-17	Aargau	Brugg	Bözberg	AFB	1	1
2014-04-23	Aargau	Brugg	Villnachern	AFB	1	1
2014-05-08	Aargau	Brugg	Bözen	AFB	12	22
2016-03-28	Aargau	Brugg	Lupfig	EFB	1	1
1995-05-15	Solothurn	Bucheggberg	Brügglen	AFB	0	0
1995-05-15	Solothurn	Bucheggberg		AFB	0	0
2004-06-03	Solothurn	Bucheggberg	Gächliwil	EFB	1	1
2005-03-30	Solothurn	Bucheggberg	Lüterkofen-Ichertswil	EFB	3	3
2005-04-29	Solothurn	Bucheggberg	Lüsslingen	EFB	2	0
2005-05-04	Solothurn	Bucheggberg	Brunnenthal	AFB	1	0
2005-05-24	Solothurn	Bucheggberg	Lüsslingen	EFB	1	1
2005-09-02	Solothurn	Bucheggberg	Lüsslingen	EFB	2	2
2005-09-02	Solothurn	Bucheggberg	Lüsslingen	EFB	3	3
2006-04-10	Solothurn	Bucheggberg	Lüsslingen	EFB	1	1
2006-04-28	Solothurn	Bucheggberg	Brügglen	EFB	3	3
2006-05-01	Solothurn	Bucheggberg	Kyburg-Buchegg	EFB	1	1
2006-05-19	Solothurn	Bucheggberg	Kyburg-Buchegg	EFB	3	3
2006-05-19	Solothurn	Bucheggberg	Kyburg-Buchegg	EFB	1	1
2006-06-15	Solothurn	Bucheggberg	Nennigkofen	EFB	4	4
2007-04-13	Solothurn	Bucheggberg	Bibern (SO)	EFB	6	6
2007-04-18	Solothurn	Bucheggberg	Lüterkofen-Ichertswil	EFB	3	3
2007-04-21	Solothurn	Bucheggberg	Lüterkofen-Ichertswil	EFB	2	2
2007-04-25	Solothurn	Bucheggberg	Balm bei Messen	EFB	1	1
2007-05-03	Solothurn	Bucheggberg	Lüterkofen-Ichertswil	EFB	1	1
2007-06-16	Solothurn	Bucheggberg	Nennigkofen	EFB	4	4
2007-06-21	Solothurn	Bucheggberg	Bibern (SO)	EFB	2	2
2008-04-20	Solothurn	Bucheggberg	Messen	EFB	1	1
2008-04-24	Solothurn	Bucheggberg	Lüsslingen	EFB	4	4
2008-04-24	Solothurn	Bucheggberg	Lüsslingen	EFB	2	2
2008-05-19	Solothurn	Bucheggberg	Küttigkofen	EFB	1	1
2008-05-24	Solothurn	Bucheggberg	Kyburg-Buchegg	EFB	4	4
2008-05-26	Solothurn	Bucheggberg	Messen	EFB	2	2
2008-05-26	Solothurn	Bucheggberg	Küttigkofen	EFB	1	1
2008-06-09	Solothurn	Bucheggberg	Brunnenthal	EFB	3	3
2008-07-04	Solothurn	Bucheggberg	Lüsslingen	EFB	2	2
2010-04-09	Solothurn	Bucheggberg	Brunnenthal	EFB	1	0
2010-04-13	Solothurn	Bucheggberg	Messen	EFB	1	0
2010-04-28	Solothurn	Bucheggberg	Lüsslingen	EFB	1	0
2010-04-28	Solothurn	Bucheggberg	Nennigkofen	EFB	1	0
2010-05-11	Solothurn	Bucheggberg	Brunnenthal	EFB	1	0
2010-05-20	Solothurn	Bucheggberg	Küttigkofen	EFB	1	0
2010-05-20	Solothurn	Bucheggberg	Küttigkofen	EFB	1	0
2010-06-09	Solothurn	Bucheggberg	Lüsslingen	EFB	1	0
2010-06-16	Solothurn	Bucheggberg	Lüterkofen-Ichertswil	EFB	3	3
2010-07-07	Solothurn	Bucheggberg	Unterramsern	EFB	1	1
2011-04-04	Solothurn	Bucheggberg	Kyburg-Buchegg	EFB	2	2
2011-05-27	Solothurn	Bucheggberg	Lüterswil	EFB	2	2
2011-05-28	Solothurn	Bucheggberg	Schnottwil	EFB	2	2
2011-05-28	Solothurn	Bucheggberg	Schnottwil	EFB	2	2
2011-05-28	Solothurn	Bucheggberg	Schnottwil	EFB	1	1
2011-07-23	Solothurn	Bucheggberg	Brunnenthal	EFB	1	1
2011-07-29	Solothurn	Bucheggberg	Schnottwil	EFB	1	1
2012-03-28	Solothurn	Bucheggberg	Kyburg-Buchegg	EFB	1	0
2012-04-28	Solothurn	Bucheggberg	Kyburg-Buchegg	EFB	1	0
2012-05-15	Solothurn	Bucheggberg	Nennigkofen	EFB	1	1
2012-07-18	Solothurn	Bucheggberg	Unterramsern	EFB	1	1
2014-05-06	Solothurn	Bucheggberg	Lüterkofen-Ichertswil	EFB	1	0
1998-03-27	Zürich	Bülach	Embrach	Varroa destructor	0	0
1998-03-27	Zürich	Bülach	Embrach	Varroa destructor	0	0
1998-03-27	Zürich	Bülach	Embrach	Varroa destructor	0	0
2005-06-08	Zürich	Bülach	Freienstein-Teufen	EFB	1	0
2007-04-27	Zürich	Bülach	Freienstein-Teufen	EFB	1	0
2007-05-04	Zürich	Bülach	Wil (ZH)	EFB	1	0
2007-06-15	Zürich	Bülach	Oberembrach	EFB	1	0
2007-08-07	Zürich	Bülach	Oberembrach	EFB	2	0
2007-08-07	Zürich	Bülach	Rorbas	EFB	1	0
2008-04-15	Zürich	Bülach	Hochfelden	EFB	0	0
2008-04-16	Zürich	Bülach	Freienstein-Teufen	EFB	0	0
2008-04-16	Zürich	Bülach	Oberembrach	EFB	0	0
2008-06-03	Zürich	Bülach	Wil (ZH)	EFB	0	0
2008-06-06	Zürich	Bülach	Kloten	EFB	0	0
2008-06-12	Zürich	Bülach	Wil (ZH)	EFB	0	0
2008-07-16	Zürich	Bülach	Oberembrach	EFB	1	0
2009-06-09	Zürich	Bülach	Dietlikon	EFB	5	0
2009-07-14	Zürich	Bülach	Eglisau	EFB	16	0
2009-08-20	Zürich	Bülach	Freienstein-Teufen	EFB	1	0
2009-09-08	Zürich	Bülach	Rorbas	EFB	16	0
2010-04-20	Zürich	Bülach	Opfikon	EFB	1	0
2010-05-05	Zürich	Bülach	Lufingen	EFB	1	0
2010-05-18	Zürich	Bülach	Embrach	EFB	1	0
2010-08-26	Zürich	Bülach	Embrach	EFB	3	0
2010-08-26	Zürich	Bülach	Embrach	Varroa destructor	1	0
2011-04-01	Zürich	Bülach	Embrach	EFB	1	0
2011-04-20	Zürich	Bülach	Rafz	EFB	1	0
2011-06-08	Zürich	Bülach	Glattfelden	EFB	1	0
2012-07-13	Zürich	Bülach	Opfikon	EFB	5	0
2012-07-17	Zürich	Bülach	Kloten	EFB	2	0
2012-10-02	Zürich	Bülach	Kloten	Varroa destructor	1	0
2013-05-07	Zürich	Bülach	Bachenbülach	EFB	2	0
2013-05-08	Zürich	Bülach	Bachenbülach	EFB	2	0
2013-05-29	Zürich	Bülach	Bülach	EFB	1	0
2016-04-27	Zürich	Bülach	Kloten	EFB	3	0
2016-07-21	Zürich	Bülach	Bülach	EFB	1	0
1997-04-15	Bern	Büren	Wengi	AFB	0	0
1997-04-15	Bern	Büren	Wengi	AFB	0	0
1997-04-15	Bern	Büren	Wengi	AFB	0	0
1999-05-15	Bern	Büren	Meinisberg	AFB	0	0
1999-05-29	Bern	Büren	Meinisberg	AFB	0	0
1999-05-29	Bern	Büren	Meinisberg	AFB	0	0
1999-05-29	Bern	Büren	Meinisberg	AFB	0	0
1999-05-29	Bern	Büren	Meinisberg	AFB	0	0
2002-07-29	Bern	Büren	Leuzigen	AFB	1	0
2002-08-08	Bern	Büren	Leuzigen	AFB	2	0
2002-08-08	Bern	Büren	Leuzigen	AFB	1	0
2003-05-05	Bern	Büren	Lengnau (BE)	EFB	1	0
2003-05-05	Bern	Büren	Lengnau (BE)	EFB	1	0
2003-06-11	Bern	Büren	Wengi	EFB	1	0
2003-07-28	Bern	Büren	Rüti bei Büren	EFB	1	0
2004-04-07	Bern	Büren	Wengi	EFB	7	0
2004-04-25	Bern	Büren	Büren an der Aare	EFB	3	0
2005-04-30	Bern	Büren	Leuzigen	EFB	2	0
2005-04-30	Bern	Büren	Leuzigen	EFB	1	0
2005-05-19	Bern	Büren	Lengnau (BE)	EFB	3	0
2005-05-28	Bern	Büren	Leuzigen	EFB	1	0
2005-05-28	Bern	Büren	Wengi	EFB	1	0
2005-06-15	Bern	Büren	Pieterlen	EFB	1	0
2005-07-01	Bern	Büren	Büetigen	EFB	1	0
2005-07-01	Bern	Büren	Pieterlen	EFB	3	0
2006-04-20	Bern	Büren	Büetigen	EFB	1	0
2006-04-24	Bern	Büren	Leuzigen	AFB	2	0
2006-05-22	Bern	Büren	Pieterlen	EFB	5	0
2007-04-19	Bern	Büren	Pieterlen	EFB	7	0
2007-05-01	Bern	Büren	Busswil bei Büren	EFB	2	0
2008-04-19	Bern	Büren	Leuzigen	EFB	0	0
2008-04-20	Bern	Büren	Busswil bei Büren	EFB	20	0
2008-05-13	Bern	Büren	Leuzigen	EFB	0	0
2008-05-20	Bern	Büren	Leuzigen	EFB	0	0
2008-05-22	Bern	Büren	Leuzigen	EFB	4	0
2008-05-22	Bern	Büren	Büren an der Aare	EFB	1	0
2008-05-25	Bern	Büren	Oberwil bei Büren	EFB	3	0
2008-05-28	Bern	Büren	Dotzigen	EFB	11	0
2008-07-12	Bern	Büren	Pieterlen	EFB	15	0
2009-04-15	Bern	Büren	Diessbach bei Büren	EFB	1	0
2009-05-01	Bern	Büren	Pieterlen	EFB	1	0
2009-05-01	Bern	Büren	Leuzigen	EFB	1	0
2009-05-29	Bern	Büren	Pieterlen	EFB	1	0
2010-04-09	Bern	Büren	Pieterlen	EFB	1	0
2010-05-03	Bern	Büren	Pieterlen	EFB	1	0
2010-05-11	Bern	Büren	Leuzigen	EFB	1	0
2010-06-01	Bern	Büren	Dotzigen	EFB	1	0
2010-09-07	Bern	Büren	Dotzigen	EFB	1	0
2011-04-11	Bern	Büren	Lengnau (BE)	EFB	1	0
2011-04-11	Bern	Büren	Diessbach bei Büren	EFB	1	0
2011-04-26	Bern	Büren	Dotzigen	EFB	1	0
2011-05-09	Bern	Büren	Leuzigen	EFB	1	0
2011-05-12	Bern	Büren	Pieterlen	EFB	1	0
2011-05-20	Bern	Büren	Pieterlen	EFB	1	0
2011-05-23	Bern	Büren	Pieterlen	EFB	1	0
2011-05-23	Bern	Büren	Pieterlen	EFB	1	0
2011-06-01	Bern	Büren	Lengnau (BE)	EFB	1	0
2012-05-07	Bern	Büren	Leuzigen	EFB	1	0
1994-08-15	Bern	Burgdorf	Hasle bei Burgdorf	AFB	0	0
1994-09-15	Bern	Burgdorf		AFB	0	0
1998-04-17	Bern	Burgdorf	Hasle bei Burgdorf	AFB	0	0
1998-05-29	Bern	Burgdorf	Hasle bei Burgdorf	AFB	0	0
2002-07-07	Bern	Burgdorf	Krauchthal	AFB	2	0
2002-07-12	Bern	Burgdorf	Krauchthal	AFB	1	0
2002-07-22	Bern	Burgdorf	Krauchthal	EFB	1	0
2002-08-13	Bern	Burgdorf	Willadingen	EFB	8	0
2002-08-20	Bern	Burgdorf	Burgdorf	EFB	5	0
2002-08-25	Bern	Burgdorf	Hasle bei Burgdorf	EFB	2	0
2002-08-31	Bern	Burgdorf	Willadingen	EFB	3	0
2002-09-07	Bern	Burgdorf	Hasle bei Burgdorf	EFB	3	0
2002-09-07	Bern	Burgdorf	Hasle bei Burgdorf	EFB	2	0
2002-09-07	Bern	Burgdorf	Hasle bei Burgdorf	EFB	3	0
2002-09-12	Bern	Burgdorf	Burgdorf	EFB	1	0
2002-09-13	Bern	Burgdorf	Willadingen	EFB	3	0
2002-09-15	Bern	Burgdorf	Hasle bei Burgdorf	EFB	5	0
2002-09-18	Bern	Burgdorf	Kirchberg (BE)	EFB	1	0
2002-09-19	Bern	Burgdorf	Koppigen	EFB	5	0
2002-09-23	Bern	Burgdorf	Burgdorf	EFB	2	0
2002-09-23	Bern	Burgdorf	Burgdorf	EFB	1	0
2002-10-13	Bern	Burgdorf	Alchenstorf	EFB	13	0
2002-10-15	Bern	Burgdorf	Kirchberg (BE)	EFB	4	0
2002-10-16	Bern	Burgdorf	Ersigen	EFB	2	0
2002-10-16	Bern	Burgdorf	Kirchberg (BE)	EFB	6	0
2003-03-13	Bern	Burgdorf	Krauchthal	EFB	4	0
2003-03-29	Bern	Burgdorf	Alchenstorf	EFB	4	0
2003-03-29	Bern	Burgdorf	Alchenstorf	EFB	4	0
2003-04-07	Bern	Burgdorf	Alchenstorf	EFB	2	0
2003-04-14	Bern	Burgdorf	Wynigen	EFB	4	0
2003-04-20	Bern	Burgdorf	Alchenstorf	EFB	2	0
2003-05-19	Bern	Burgdorf	Wynigen	EFB	2	0
2003-06-03	Bern	Burgdorf	Koppigen	EFB	0	0
2003-06-03	Bern	Burgdorf	Oberburg	EFB	0	0
2003-06-03	Bern	Burgdorf	Burgdorf	EFB	0	0
2003-06-03	Bern	Burgdorf	Kirchberg (BE)	EFB	0	0
2003-06-03	Bern	Burgdorf	Kirchberg (BE)	EFB	0	0
2003-06-03	Bern	Burgdorf	Koppigen	EFB	0	0
2003-06-03	Bern	Burgdorf	Burgdorf	EFB	0	0
2003-06-03	Bern	Burgdorf	Ersigen	EFB	0	0
2003-06-04	Bern	Burgdorf	Alchenstorf	EFB	1	0
2003-06-16	Bern	Burgdorf	Heimiswil	EFB	1	0
2003-09-08	Bern	Burgdorf	Burgdorf	AFB	1	0
2003-09-15	Bern	Burgdorf	Hindelbank	EFB	2	0
2004-06-11	Bern	Burgdorf	Oberburg	AFB	1	0
2004-08-12	Bern	Burgdorf	Hasle bei Burgdorf	EFB	1	0
2005-04-28	Bern	Burgdorf	Hasle bei Burgdorf	EFB	3	0
2005-06-09	Bern	Burgdorf	Koppigen	EFB	14	0
2005-06-09	Bern	Burgdorf	Koppigen	EFB	13	0
2005-07-01	Bern	Burgdorf	Ersigen	EFB	13	0
2005-07-25	Bern	Burgdorf	Hasle bei Burgdorf	EFB	3	0
2006-05-22	Bern	Burgdorf	Wynigen	EFB	5	0
2006-06-12	Bern	Burgdorf	Oberösch	EFB	1	0
2006-06-12	Bern	Burgdorf	Wynigen	EFB	4	0
2006-06-12	Bern	Burgdorf	Wynigen	EFB	1	0
2006-06-19	Bern	Burgdorf	Wynigen	EFB	5	0
2006-06-19	Bern	Burgdorf	Wynigen	EFB	4	0
2007-04-20	Bern	Burgdorf	Wynigen	EFB	5	0
2007-04-21	Bern	Burgdorf	Wynigen	EFB	6	0
2007-04-26	Bern	Burgdorf	Wynigen	EFB	1	0
2007-05-04	Bern	Burgdorf	Wynigen	EFB	2	0
2007-05-11	Bern	Burgdorf	Wynigen	EFB	2	0
2007-05-11	Bern	Burgdorf	Wynigen	EFB	4	0
2007-05-14	Bern	Burgdorf	Wynigen	EFB	1	0
2007-05-16	Bern	Burgdorf	Wynigen	EFB	2	0
2007-05-22	Bern	Burgdorf	Wynigen	EFB	3	0
2007-05-22	Bern	Burgdorf	Wynigen	EFB	3	0
2007-05-28	Bern	Burgdorf	Kirchberg (BE)	EFB	4	0
2007-06-12	Bern	Burgdorf	Kirchberg (BE)	EFB	1	0
2007-06-21	Bern	Burgdorf	Koppigen	EFB	6	0
2007-08-07	Bern	Burgdorf	Kirchberg (BE)	EFB	2	0
2007-08-08	Bern	Burgdorf	Burgdorf	EFB	2	0
2007-08-08	Bern	Burgdorf	Kirchberg (BE)	EFB	2	0
2007-08-08	Bern	Burgdorf	Kirchberg (BE)	EFB	3	0
2007-08-16	Bern	Burgdorf	Burgdorf	EFB	2	0
2007-08-20	Bern	Burgdorf	Koppigen	EFB	7	0
2007-08-28	Bern	Burgdorf	Alchenstorf	EFB	3	0
2007-08-30	Bern	Burgdorf	Heimiswil	AFB	6	0
2007-09-01	Bern	Burgdorf	Heimiswil	EFB	1	0
2007-09-05	Bern	Burgdorf	Alchenstorf	EFB	1	0
2007-10-04	Bern	Burgdorf	Koppigen	EFB	1	0
2007-10-19	Bern	Burgdorf	Wynigen	EFB	1	0
2008-05-28	Bern	Burgdorf	Krauchthal	AFB	2	0
2008-05-28	Bern	Burgdorf	Burgdorf	EFB	8	0
2008-05-28	Bern	Burgdorf	Alchenstorf	EFB	1	0
2008-05-28	Bern	Burgdorf	Oberburg	EFB	2	0
2008-05-28	Bern	Burgdorf	Burgdorf	EFB	3	0
2008-05-28	Bern	Burgdorf	Heimiswil	EFB	8	0
2008-05-28	Bern	Burgdorf	Burgdorf	EFB	1	0
2008-05-28	Bern	Burgdorf	Kirchberg (BE)	EFB	3	0
2008-05-28	Bern	Burgdorf	Wynigen	EFB	1	0
2008-05-28	Bern	Burgdorf	Heimiswil	EFB	1	0
2008-05-28	Bern	Burgdorf	Oberburg	EFB	3	0
2008-05-28	Bern	Burgdorf	Alchenstorf	EFB	2	0
2008-05-30	Bern	Burgdorf	Heimiswil	EFB	1	0
2008-06-02	Bern	Burgdorf	Wynigen	EFB	1	0
2008-06-03	Bern	Burgdorf	Heimiswil	EFB	2	0
2008-06-10	Bern	Burgdorf	Burgdorf	EFB	2	0
2008-06-16	Bern	Burgdorf	Oberburg	EFB	1	0
2008-06-16	Bern	Burgdorf	Wynigen	EFB	1	0
2008-06-21	Bern	Burgdorf	Oberburg	EFB	1	0
2008-06-23	Bern	Burgdorf	Oberburg	EFB	2	0
2008-06-23	Bern	Burgdorf	Oberburg	EFB	1	0
2008-07-02	Bern	Burgdorf	Heimiswil	EFB	2	0
2008-07-04	Bern	Burgdorf	Heimiswil	EFB	3	0
2008-07-19	Bern	Burgdorf	Heimiswil	EFB	2	0
2008-07-21	Bern	Burgdorf	Heimiswil	EFB	3	0
2008-07-21	Bern	Burgdorf	Hasle bei Burgdorf	EFB	1	0
2008-08-22	Bern	Burgdorf	Oberburg	EFB	1	0
2008-08-26	Bern	Burgdorf	Oberburg	EFB	1	0
2008-09-16	Bern	Burgdorf	Wynigen	EFB	1	0
2008-10-20	Bern	Burgdorf	Lyssach	EFB	2	0
2009-04-15	Bern	Burgdorf	Kirchberg (BE)	EFB	1	0
2009-04-16	Bern	Burgdorf	Heimiswil	EFB	1	0
2009-04-16	Bern	Burgdorf	Oberburg	EFB	1	0
2009-04-23	Bern	Burgdorf	Wynigen	EFB	1	0
2009-04-23	Bern	Burgdorf	Hasle bei Burgdorf	EFB	1	0
2009-05-01	Bern	Burgdorf	Kirchberg (BE)	EFB	1	0
2009-05-01	Bern	Burgdorf	Oberburg	EFB	1	0
2009-05-07	Bern	Burgdorf	Burgdorf	EFB	1	0
2009-05-07	Bern	Burgdorf	Heimiswil	EFB	1	0
2009-05-13	Bern	Burgdorf	Heimiswil	EFB	1	0
2009-05-13	Bern	Burgdorf	Kirchberg (BE)	EFB	1	0
2009-05-19	Bern	Burgdorf	Kirchberg (BE)	EFB	1	0
2009-05-19	Bern	Burgdorf	Kirchberg (BE)	EFB	1	0
2009-05-19	Bern	Burgdorf	Hasle bei Burgdorf	EFB	1	0
2009-05-19	Bern	Burgdorf	Burgdorf	EFB	1	0
2009-05-19	Bern	Burgdorf	Hasle bei Burgdorf	EFB	1	0
2009-05-19	Bern	Burgdorf	Burgdorf	EFB	1	0
2009-05-19	Bern	Burgdorf	Burgdorf	EFB	1	0
2009-05-27	Bern	Burgdorf	Wynigen	EFB	1	0
2009-05-27	Bern	Burgdorf	Oberburg	EFB	1	0
2009-05-27	Bern	Burgdorf	Wynigen	EFB	1	0
2009-06-03	Bern	Burgdorf	Hasle bei Burgdorf	EFB	1	0
2009-06-09	Bern	Burgdorf	Heimiswil	EFB	1	0
2009-06-09	Bern	Burgdorf	Kirchberg (BE)	EFB	1	0
2009-06-09	Bern	Burgdorf	Oberburg	EFB	1	0
2009-06-24	Bern	Burgdorf	Alchenstorf	EFB	1	0
2009-06-24	Bern	Burgdorf	Heimiswil	EFB	1	0
2009-06-24	Bern	Burgdorf	Oberburg	EFB	1	0
2009-06-24	Bern	Burgdorf	Hasle bei Burgdorf	EFB	1	0
2009-07-01	Bern	Burgdorf	Heimiswil	EFB	1	0
2009-07-01	Bern	Burgdorf	Oberburg	EFB	1	0
2009-07-03	Bern	Burgdorf	Wynigen	EFB	1	0
2009-07-03	Bern	Burgdorf	Wynigen	EFB	1	0
2009-07-28	Bern	Burgdorf	Hasle bei Burgdorf	EFB	1	0
2009-08-26	Bern	Burgdorf	Burgdorf	EFB	1	0
2009-09-02	Bern	Burgdorf	Oberburg	EFB	1	0
2009-09-02	Bern	Burgdorf	Hasle bei Burgdorf	EFB	1	0
2009-09-02	Bern	Burgdorf	Burgdorf	EFB	1	0
2009-09-09	Bern	Burgdorf	Krauchthal	EFB	1	0
2009-09-15	Bern	Burgdorf	Oberburg	EFB	1	0
2009-10-01	Bern	Burgdorf	Oberburg	EFB	1	0
2010-04-23	Bern	Burgdorf	Kirchberg (BE)	EFB	1	0
2010-04-23	Bern	Burgdorf	Koppigen	EFB	1	0
2010-04-23	Bern	Burgdorf	Hasle bei Burgdorf	EFB	1	0
2010-04-23	Bern	Burgdorf	Burgdorf	EFB	1	0
2010-04-23	Bern	Burgdorf	Hasle bei Burgdorf	EFB	1	0
2010-04-23	Bern	Burgdorf	Hasle bei Burgdorf	EFB	1	0
2010-04-26	Bern	Burgdorf	Kirchberg (BE)	EFB	1	0
2010-04-26	Bern	Burgdorf	Oberburg	EFB	1	0
2010-04-26	Bern	Burgdorf	Oberburg	EFB	1	0
2010-04-27	Bern	Burgdorf	Oberburg	EFB	1	0
2010-04-29	Bern	Burgdorf	Wynigen	EFB	1	0
2010-04-30	Bern	Burgdorf	Oberburg	EFB	1	0
2010-04-30	Bern	Burgdorf	Burgdorf	EFB	1	0
2010-05-03	Bern	Burgdorf	Oberburg	EFB	1	0
2010-05-03	Bern	Burgdorf	Wynigen	EFB	1	0
2010-05-09	Bern	Burgdorf	Hasle bei Burgdorf	EFB	1	0
2010-05-10	Bern	Burgdorf	Oberburg	EFB	1	0
2010-05-11	Bern	Burgdorf	Wynigen	EFB	1	0
2010-05-14	Bern	Burgdorf	Wynigen	EFB	1	0
2010-05-14	Bern	Burgdorf	Heimiswil	EFB	1	0
2010-05-20	Bern	Burgdorf	Heimiswil	EFB	1	0
2010-05-21	Bern	Burgdorf	Krauchthal	EFB	1	0
2010-05-22	Bern	Burgdorf	Heimiswil	EFB	1	0
2010-05-27	Bern	Burgdorf	Kirchberg (BE)	EFB	1	0
2010-05-27	Bern	Burgdorf	Heimiswil	EFB	1	0
2010-06-01	Bern	Burgdorf	Krauchthal	EFB	1	0
2010-06-01	Bern	Burgdorf	Hasle bei Burgdorf	EFB	1	0
2010-06-05	Bern	Burgdorf	Wynigen	EFB	1	0
2010-06-18	Bern	Burgdorf	Hasle bei Burgdorf	EFB	1	0
2010-06-29	Bern	Burgdorf	Oberburg	EFB	1	0
2010-07-02	Bern	Burgdorf	Wynigen	EFB	1	0
2010-07-05	Bern	Burgdorf	Oberburg	EFB	1	0
2010-07-05	Bern	Burgdorf	Hasle bei Burgdorf	EFB	1	0
2010-07-06	Bern	Burgdorf	Wynigen	EFB	1	0
2010-07-07	Bern	Burgdorf	Krauchthal	EFB	1	0
2010-07-13	Bern	Burgdorf	Wynigen	EFB	1	0
2010-07-22	Bern	Burgdorf	Oberburg	EFB	1	0
2010-07-22	Bern	Burgdorf	Hasle bei Burgdorf	EFB	1	0
2010-07-31	Bern	Burgdorf	Hasle bei Burgdorf	EFB	1	0
2010-08-10	Bern	Burgdorf	Wynigen	EFB	1	0
2010-08-23	Bern	Burgdorf	Hasle bei Burgdorf	EFB	1	0
2010-08-25	Bern	Burgdorf	Hasle bei Burgdorf	EFB	1	0
2011-03-28	Bern	Burgdorf	Hasle bei Burgdorf	EFB	1	0
2011-03-28	Bern	Burgdorf	Hasle bei Burgdorf	EFB	1	0
2011-04-11	Bern	Burgdorf	Krauchthal	EFB	1	0
2011-04-11	Bern	Burgdorf	Oberburg	EFB	1	0
2011-04-13	Bern	Burgdorf	Krauchthal	EFB	1	0
2011-04-13	Bern	Burgdorf	Krauchthal	EFB	1	0
2011-04-14	Bern	Burgdorf	Oberburg	EFB	1	0
2011-04-21	Bern	Burgdorf	Hasle bei Burgdorf	EFB	1	0
2011-04-28	Bern	Burgdorf	Heimiswil	EFB	1	0
2011-04-28	Bern	Burgdorf	Hasle bei Burgdorf	EFB	1	0
2011-05-03	Bern	Burgdorf	Wynigen	EFB	1	0
2011-05-03	Bern	Burgdorf	Krauchthal	EFB	1	0
2011-05-06	Bern	Burgdorf	Heimiswil	EFB	1	0
2011-05-09	Bern	Burgdorf	Oberburg	EFB	1	0
2011-05-12	Bern	Burgdorf	Hasle bei Burgdorf	EFB	1	0
2011-05-23	Bern	Burgdorf	Oberburg	EFB	1	0
2011-05-25	Bern	Burgdorf	Heimiswil	EFB	1	0
2011-05-27	Bern	Burgdorf	Oberburg	EFB	1	0
2011-06-16	Bern	Burgdorf	Hasle bei Burgdorf	EFB	1	0
2011-06-17	Bern	Burgdorf	Wynigen	EFB	1	0
2011-06-20	Bern	Burgdorf	Heimiswil	EFB	1	0
2011-06-20	Bern	Burgdorf	Heimiswil	EFB	1	0
2011-06-23	Bern	Burgdorf	Heimiswil	EFB	1	0
2011-07-15	Bern	Burgdorf	Hasle bei Burgdorf	EFB	1	0
2011-08-11	Bern	Burgdorf	Wynigen	EFB	1	0
2011-08-11	Bern	Burgdorf	Hasle bei Burgdorf	EFB	1	0
2011-08-12	Bern	Burgdorf	Heimiswil	EFB	1	0
2011-08-12	Bern	Burgdorf	Heimiswil	EFB	1	0
2011-10-03	Bern	Burgdorf	Ersigen	EFB	1	0
2012-03-29	Bern	Burgdorf	Oberburg	EFB	1	0
2012-03-30	Bern	Burgdorf	Kirchberg (BE)	EFB	1	0
2012-03-30	Bern	Burgdorf	Kirchberg (BE)	EFB	1	0
2012-04-10	Bern	Burgdorf	Wynigen	EFB	1	0
2012-04-24	Bern	Burgdorf	Hindelbank	EFB	1	0
2012-04-30	Bern	Burgdorf	Bäriswil	EFB	1	0
2012-04-30	Bern	Burgdorf	Ersigen	EFB	1	0
2012-05-02	Bern	Burgdorf	Heimiswil	EFB	1	0
2012-05-03	Bern	Burgdorf	Oberburg	EFB	1	0
2012-05-16	Bern	Burgdorf	Heimiswil	EFB	1	0
2012-05-21	Bern	Burgdorf	Hasle bei Burgdorf	EFB	1	0
1991-09-15	Wallis	Conthey		EFB	0	0
1992-05-15	Wallis	Conthey		AFB	0	0
1992-05-15	Wallis	Conthey		EFB	0	0
1992-06-15	Wallis	Conthey		AFB	0	0
1992-06-15	Wallis	Conthey		AFB	0	0
1992-06-15	Wallis	Conthey		AFB	0	0
1992-06-15	Wallis	Conthey		AFB	0	0
1992-07-15	Wallis	Conthey		AFB	0	0
1992-07-15	Wallis	Conthey		AFB	0	0
1993-06-15	Wallis	Conthey		AFB	0	0
1993-06-15	Wallis	Conthey		AFB	0	0
1993-06-15	Wallis	Conthey		AFB	0	0
1993-09-15	Wallis	Conthey		Varroa destructor	0	0
1993-12-15	Wallis	Conthey		Varroa destructor	0	0
1994-03-15	Wallis	Conthey	Chamoson	AFB	33	0
1994-03-15	Wallis	Conthey		Varroa destructor	33	0
1994-03-15	Wallis	Conthey		Varroa destructor	24	0
1994-03-15	Wallis	Conthey		Varroa destructor	3	0
1994-04-15	Wallis	Conthey		Varroa destructor	8	0
1994-04-15	Wallis	Conthey	VÈtroz	Varroa destructor	0	0
1994-04-15	Wallis	Conthey	VÈtroz	Varroa destructor	0	0
1994-04-15	Wallis	Conthey	VÈtroz	Varroa destructor	0	0
1994-04-15	Wallis	Conthey		Varroa destructor	0	0
1994-04-15	Wallis	Conthey	VÈtroz	Varroa destructor	0	0
1994-04-15	Wallis	Conthey	VÈtroz	Varroa destructor	0	0
1994-04-15	Wallis	Conthey	VÈtroz	Varroa destructor	0	0
1994-04-15	Wallis	Conthey	VÈtroz	Varroa destructor	0	0
1995-03-15	Wallis	Conthey	VÈtroz	Varroa destructor	0	0
1996-06-15	Wallis	Conthey		EFB	0	0
1996-08-15	Wallis	Conthey		AFB	0	0
1997-03-15	Wallis	Conthey	Nendaz	AFB	0	0
1997-03-15	Wallis	Conthey	Nendaz	AFB	0	0
1997-04-15	Wallis	Conthey	Nendaz	AFB	0	0
1997-04-15	Wallis	Conthey	VÈtroz	AFB	0	0
1997-04-15	Wallis	Conthey	VÈtroz	AFB	0	0
1997-04-15	Wallis	Conthey	Nendaz	AFB	0	0
1997-10-15	Wallis	Conthey	Chamoson	Varroa destructor	0	0
1998-06-19	Wallis	Conthey	Nendaz	Varroa destructor	0	0
1998-06-19	Wallis	Conthey	Conthey	Varroa destructor	0	0
1998-07-17	Wallis	Conthey	Nendaz	AFB	0	0
1998-07-31	Wallis	Conthey	Nendaz	Varroa destructor	0	0
1998-07-31	Wallis	Conthey	Nendaz	Varroa destructor	0	0
1998-08-28	Wallis	Conthey	VÈtroz	AFB	0	0
1998-08-28	Wallis	Conthey	VÈtroz	AFB	0	0
1999-05-22	Wallis	Conthey	Nendaz	AFB	0	0
1999-06-12	Wallis	Conthey	Nendaz	AFB	3	0
1999-06-12	Wallis	Conthey	Nendaz	AFB	3	0
1999-07-03	Wallis	Conthey	Nendaz	Varroa destructor	0	0
2000-04-15	Wallis	Conthey	VÈtroz	AFB	5	0
2000-04-15	Wallis	Conthey	VÈtroz	AFB	1	0
2000-05-15	Wallis	Conthey	Nendaz	AFB	2	0
2000-06-15	Wallis	Conthey	Nendaz	AFB	0	0
2001-05-15	Wallis	Conthey	Chamoson	AFB	2	0
2001-09-20	Wallis	Conthey	VÈtroz	AFB	0	0
2002-08-28	Wallis	Conthey	Conthey	AFB	3	0
2007-05-22	Wallis	Conthey	Nendaz	EFB	1	0
2014-09-04	Wallis	Conthey	Conthey	EFB	1	1
2015-06-03	Wallis	Conthey	Conthey	EFB	1	2
1991-09-15	Waadt	Cossonay	Mex (VD)	AFB	3	0
1991-10-15	Waadt	Cossonay	Cottens (VD)	AFB	0	0
1993-03-15	Waadt	Cossonay		Varroa destructor	0	0
1995-03-15	Waadt	Cossonay		Varroa destructor	0	0
1995-09-15	Waadt	Cossonay		AFB	0	0
1995-09-15	Waadt	Cossonay		AFB	0	0
1996-08-23	Waadt	Cossonay		AFB	1	1
1997-08-04	Waadt	Cossonay	Montricher	AFB	1	1
1997-08-04	Waadt	Cossonay	L'Isle	AFB	1	1
1997-08-04	Waadt	Cossonay	Montricher	AFB	1	1
1998-04-03	Waadt	Cossonay	Montricher	AFB	1	0
1998-05-18	Waadt	Cossonay	Orny	EFB	1	0
1998-05-19	Waadt	Cossonay	Cottens (VD)	AFB	1	0
1999-01-05	Waadt	Cossonay	L'Isle	AFB	3	0
1999-01-05	Waadt	Cossonay	L'Isle	AFB	1	0
2000-06-22	Waadt	Cossonay	Cossonay	AFB	1	0
2002-06-17	Waadt	Cossonay	Grancy	AFB	1	1
2002-07-22	Waadt	Cossonay	Penthalaz	AFB	1	0
2003-10-03	Waadt	Cossonay	Montricher	AFB	1	0
2006-06-19	Waadt	Cossonay	Orny	AFB	1	0
2006-06-27	Waadt	Cossonay	Cossonay	AFB	1	0
2006-06-30	Waadt	Cossonay	Cossonay	AFB	1	0
2006-07-06	Waadt	Cossonay	Senarclens	AFB	1	0
2006-09-20	Waadt	Cossonay	Senarclens	AFB	1	0
2007-05-02	Waadt	Cossonay	Senarclens	AFB	1	0
2007-08-28	Waadt	Cossonay	Bettens	AFB	1	0
2007-09-18	Waadt	Cossonay	Daillens	AFB	1	0
2008-07-03	Waadt	Cossonay	Boussens	AFB	4	0
2009-04-27	Waadt	Cossonay	Vufflens-la-Ville	AFB	1	0
2009-04-27	Waadt	Cossonay	Vufflens-la-Ville	AFB	1	0
2009-08-26	Waadt	Cossonay	Pampigny	AFB	1	0
2009-08-31	Waadt	Cossonay	Pampigny	AFB	1	0
1993-06-15	Bern	Courtelary		AFB	0	0
1993-09-15	Bern	Courtelary		AFB	0	0
1994-05-15	Bern	Courtelary		AFB	0	0
1994-06-15	Bern	Courtelary	Souboz	EFB	0	0
1995-06-15	Bern	Courtelary		AFB	0	0
1996-05-15	Bern	Courtelary	Courtelary	AFB	0	0
1996-05-15	Bern	Courtelary	Courtelary	AFB	0	0
1996-05-15	Bern	Courtelary	Courtelary	AFB	0	0
1996-05-15	Bern	Courtelary	Courtelary	AFB	0	0
1997-06-15	Bern	Courtelary	Plagne	AFB	0	0
1998-08-28	Bern	Courtelary	Sonvilier	AFB	0	0
1998-10-30	Bern	Courtelary	Orvin	AFB	0	0
2000-04-15	Bern	Courtelary	Sonvilier	AFB	0	0
2000-05-15	Bern	Courtelary	Sonvilier	AFB	0	0
2001-06-05	Bern	Courtelary	Orvin	AFB	1	0
2002-05-13	Bern	Courtelary	Mont-Tramelan	EFB	1	0
2002-07-24	Bern	Courtelary	Orvin	AFB	3	0
2003-06-04	Bern	Courtelary	Sonceboz-Sombeval	EFB	1	0
2004-05-13	Bern	Courtelary	Cormoret	AFB	1	0
2005-09-03	Bern	Courtelary	PÈry	AFB	3	0
2005-09-03	Bern	Courtelary	PÈry	AFB	6	0
2009-10-09	Bern	Courtelary	Mont-Tramelan	EFB	1	0
2011-07-25	Bern	Courtelary	Romont (BE)	AFB	1	0
2011-07-25	Bern	Courtelary	Romont (BE)	AFB	1	0
2011-07-27	Bern	Courtelary	Plagne	AFB	1	0
2011-07-28	Bern	Courtelary	Plagne	AFB	1	0
2011-07-28	Bern	Courtelary	Vauffelin	AFB	1	0
2011-08-08	Bern	Courtelary	PÈry	AFB	1	0
2011-08-11	Bern	Courtelary	Vauffelin	EFB	1	0
2011-08-17	Bern	Courtelary	La Heutte	AFB	1	0
2011-08-19	Bern	Courtelary	PÈry	AFB	1	0
2011-08-22	Bern	Courtelary	PÈry	AFB	1	0
2012-04-18	Bern	Courtelary	Sonvilier	AFB	1	0
2012-04-30	Bern	Courtelary	Renan (BE)	AFB	1	0
2012-04-30	Bern	Courtelary	Sonvilier	AFB	1	0
1992-08-15	Jura	DelÈmont		AFB	0	0
1992-08-15	Jura	DelÈmont		AFB	0	0
1992-08-15	Jura	DelÈmont		AFB	0	0
1992-08-15	Jura	DelÈmont		AFB	0	0
1992-08-15	Jura	DelÈmont		AFB	0	0
1996-08-15	Jura	DelÈmont		AFB	0	0
1996-08-15	Jura	DelÈmont		AFB	0	0
1997-05-16	Jura	DelÈmont	Courfaivre	AFB	0	0
1998-06-09	Jura	DelÈmont	Courroux	AFB	0	0
2003-06-03	Jura	DelÈmont	Courfaivre	AFB	0	0
2009-08-28	Jura	DelÈmont	CourtÈtelle	AFB	17	17
2011-05-03	Jura	DelÈmont	CourtÈtelle	AFB	1	1
1995-03-15	Zürich	Dielsdorf		Varroa destructor	0	0
1997-04-15	Zürich	Dielsdorf	Steinmaur	Varroa destructor	0	0
2001-08-15	Zürich	Dielsdorf	Niederhasli	EFB	2	0
2003-04-17	Zürich	Dielsdorf	Dielsdorf	EFB	2	0
2003-04-17	Zürich	Dielsdorf	Boppelsen	EFB	1	0
2003-04-25	Zürich	Dielsdorf	Dielsdorf	EFB	2	0
2004-05-31	Zürich	Dielsdorf	Niederhasli	EFB	1	0
2008-06-10	Zürich	Dielsdorf	Schöfflisdorf	EFB	0	0
2008-06-12	Zürich	Dielsdorf	Regensdorf	EFB	0	0
2008-06-26	Zürich	Dielsdorf	Niederweningen	EFB	1	1
2008-07-07	Zürich	Dielsdorf	Niederweningen	EFB	10	0
2008-07-15	Zürich	Dielsdorf	Otelfingen	EFB	1	0
2009-04-20	Zürich	Dielsdorf	Regensdorf	AFB	9	0
2009-04-20	Zürich	Dielsdorf	Regensdorf	EFB	0	0
2009-04-29	Zürich	Dielsdorf	Rümlang	EFB	0	0
2009-05-04	Zürich	Dielsdorf	Regensdorf	EFB	0	0
2009-05-04	Zürich	Dielsdorf	Regensdorf	EFB	0	0
2009-05-15	Zürich	Dielsdorf	Rümlang	EFB	16	0
2009-05-25	Zürich	Dielsdorf	Niederhasli	EFB	3	0
2009-05-25	Zürich	Dielsdorf	Niederhasli	EFB	8	0
2010-04-12	Zürich	Dielsdorf	Niederhasli	EFB	1	1
2011-04-14	Zürich	Dielsdorf	Steinmaur	EFB	1	0
2011-05-03	Zürich	Dielsdorf	Schöfflisdorf	AFB	1	0
2011-05-14	Zürich	Dielsdorf	Steinmaur	EFB	1	0
2011-07-18	Zürich	Dielsdorf	Bachs	AFB	5	0
2011-07-22	Zürich	Dielsdorf	Bachs	EFB	1	0
2011-07-26	Zürich	Dielsdorf	Bachs	EFB	1	0
2011-08-04	Zürich	Dielsdorf	Bachs	EFB	1	0
2011-08-10	Zürich	Dielsdorf	Bachs	AFB	2	0
2011-08-10	Zürich	Dielsdorf	Bachs	AFB	1	0
2012-03-06	Zürich	Dielsdorf	Boppelsen	Varroa destructor	4	0
2012-03-20	Zürich	Dielsdorf	Niederweningen	Varroa destructor	1	0
2012-05-01	Zürich	Dielsdorf	Oberweningen	EFB	4	0
2012-05-09	Zürich	Dielsdorf	Niederhasli	EFB	2	0
2012-05-15	Zürich	Dielsdorf	Niederhasli	EFB	2	0
2012-05-21	Zürich	Dielsdorf	Niederhasli	EFB	1	0
2012-05-25	Zürich	Dielsdorf	Otelfingen	EFB	7	0
2012-05-25	Zürich	Dielsdorf	Otelfingen	Varroa destructor	1	0
2012-06-05	Zürich	Dielsdorf	Oberweningen	EFB	1	0
2012-06-19	Zürich	Dielsdorf	Oberglatt	AFB	1	0
2012-07-12	Zürich	Dielsdorf	Niederglatt	EFB	1	0
2012-07-12	Zürich	Dielsdorf	Niederglatt	Varroa destructor	1	0
2012-07-13	Zürich	Dielsdorf	Regensdorf	EFB	1	0
2012-08-02	Zürich	Dielsdorf	Boppelsen	EFB	1	0
2012-09-20	Zürich	Dielsdorf	Niederhasli	Varroa destructor	2	0
2013-02-05	Zürich	Dielsdorf	Hüttikon	Varroa destructor	1	0
2013-05-08	Zürich	Dielsdorf	Steinmaur	EFB	1	0
2013-05-15	Zürich	Dielsdorf	Oberglatt	EFB	1	0
2013-05-15	Zürich	Dielsdorf	Steinmaur	EFB	1	0
2013-05-22	Zürich	Dielsdorf	Niederweningen	EFB	1	0
2013-05-29	Zürich	Dielsdorf	Regensdorf	EFB	2	0
2013-05-31	Zürich	Dielsdorf	Oberweningen	EFB	1	0
2013-07-01	Zürich	Dielsdorf	Steinmaur	EFB	1	0
2013-07-01	Zürich	Dielsdorf	Regensdorf	EFB	1	0
2013-07-01	Zürich	Dielsdorf	Niederweningen	EFB	2	0
2013-07-19	Zürich	Dielsdorf	Stadel	EFB	1	0
2013-09-01	Zürich	Dielsdorf	Niederhasli	EFB	1	0
2013-09-01	Zürich	Dielsdorf	Niederhasli	Varroa destructor	1	0
2014-03-21	Zürich	Dielsdorf	Boppelsen	EFB	1	0
2014-04-10	Zürich	Dielsdorf	Oberweningen	EFB	1	0
2014-04-11	Zürich	Dielsdorf	Oberweningen	AFB	1	0
2014-04-11	Zürich	Dielsdorf	Oberweningen	EFB	1	0
2014-06-27	Zürich	Dielsdorf	Niederweningen	EFB	1	0
2014-08-06	Zürich	Dielsdorf	Niederhasli	Varroa destructor	5	0
2015-05-17	Zürich	Dielsdorf	Niederhasli	EFB	2	0
2015-05-27	Zürich	Dielsdorf	Bachs	EFB	1	0
2015-06-02	Zürich	Dielsdorf	Niederhasli	EFB	1	0
2015-06-02	Zürich	Dielsdorf	Schöfflisdorf	EFB	1	0
2015-06-04	Zürich	Dielsdorf	Bachs	EFB	1	0
2015-06-17	Zürich	Dielsdorf	Niederhasli	EFB	1	0
2015-06-23	Zürich	Dielsdorf	Niederhasli	EFB	2	0
2015-06-24	Zürich	Dielsdorf	Bachs	EFB	2	0
2015-07-10	Zürich	Dielsdorf	Stadel	EFB	1	0
2016-04-12	Zürich	Dielsdorf	Oberglatt	EFB	1	0
2016-04-21	Zürich	Dielsdorf	Neerach	Varroa destructor	1	0
2016-05-10	Zürich	Dielsdorf	Buchs (ZH)	EFB	2	0
2016-05-26	Zürich	Dielsdorf	Schöfflisdorf	EFB	1	0
2016-06-01	Zürich	Dielsdorf	Niederglatt	EFB	6	0
2016-06-14	Zürich	Dielsdorf	Dielsdorf	EFB	1	0
2016-06-28	Zürich	Dielsdorf	Dielsdorf	EFB	2	0
2016-06-30	Zürich	Dielsdorf	Dielsdorf	EFB	1	0
2016-07-07	Zürich	Dielsdorf	Regensberg	EFB	1	0
2016-07-26	Zürich	Dielsdorf	Neerach	EFB	1	0
2016-08-09	Zürich	Dielsdorf	Neerach	EFB	1	0
2016-08-09	Zürich	Dielsdorf	Neerach	Varroa destructor	1	0
2016-08-12	Zürich	Dielsdorf	Stadel	Varroa destructor	1	0
2016-09-01	Zürich	Dielsdorf	Steinmaur	Varroa destructor	1	0
2016-09-02	Zürich	Dielsdorf	Steinmaur	EFB	1	0
2016-09-29	Zürich	Dielsdorf	Steinmaur	Varroa destructor	4	0
1995-06-15	Zürich	Dietikon		EFB	0	0
1997-10-15	Zürich	Dietikon	Weiningen (ZH)	EFB	0	0
1997-10-15	Zürich	Dietikon	Weiningen (ZH)	EFB	0	0
1997-10-15	Zürich	Dietikon	Weiningen (ZH)	Varroa destructor	0	0
1997-10-15	Zürich	Dietikon	Weiningen (ZH)	Varroa destructor	0	0
1998-02-21	Zürich	Dietikon	Uitikon	Varroa destructor	0	0
2002-11-22	Zürich	Dietikon	Dietikon	Varroa destructor	1	0
2006-07-05	Zürich	Dietikon	Uitikon	EFB	1	0
2008-06-03	Zürich	Dietikon	Weiningen (ZH)	EFB	0	0
2008-07-01	Zürich	Dietikon	Uitikon	EFB	7	0
2010-06-15	Zürich	Dietikon	Uitikon	EFB	1	0
2010-07-08	Zürich	Dietikon	Dietikon	EFB	1	0
2010-07-08	Zürich	Dietikon	Aesch bei Birmensdorf	EFB	1	0
2010-07-14	Zürich	Dietikon	Aesch bei Birmensdorf	EFB	1	0
2010-07-19	Zürich	Dietikon	Aesch bei Birmensdorf	EFB	1	0
2010-09-03	Zürich	Dietikon	Aesch bei Birmensdorf	EFB	1	0
2016-08-12	Zürich	Dietikon	Birmensdorf (ZH)	Varroa destructor	9	0
2016-08-16	Zürich	Dietikon	Birmensdorf (ZH)	EFB	1	0
1999-08-07	Solothurn	Dorneck	Hochwald	AFB	0	0
2003-09-03	Solothurn	Dorneck	Metzerlen	AFB	2	2
2003-09-04	Solothurn	Dorneck	Metzerlen	AFB	12	12
2014-10-21	Solothurn	Dorneck	Witterswil	Varroa destructor	4	0
2015-04-30	Solothurn	Dorneck	Gempen	AFB	1	0
2015-05-05	Solothurn	Dorneck	Gempen	AFB	1	0
2016-08-15	Solothurn	Dorneck	Gempen	AFB	1	0
1994-05-15	Waadt	Echallens	Boussens	EFB	0	0
1997-08-07	Waadt	Echallens	Vuarrens	AFB	1	1
1998-08-18	Waadt	Echallens	Essertines-sur-Yverdon	AFB	1	0
1999-08-12	Waadt	Echallens	Etagnières	Varroa destructor	0	1
1999-08-16	Waadt	Echallens	Vuarrens	AFB	1	0
1999-08-16	Waadt	Echallens	Essertines-sur-Yverdon	AFB	1	0
1999-08-16	Waadt	Echallens	Vuarrens	Varroa destructor	1	0
1999-08-16	Waadt	Echallens	Essertines-sur-Yverdon	Varroa destructor	1	0
1999-09-10	Waadt	Echallens	Essertines-sur-Yverdon	Varroa destructor	1	0
1999-09-10	Waadt	Echallens	Vuarrens	Varroa destructor	0	0
2000-08-24	Waadt	Echallens	Echallens	AFB	2	0
2000-11-14	Waadt	Echallens	Echallens	AFB	1	0
2003-03-17	Waadt	Echallens	Cugy (VD)	AFB	1	0
2003-03-20	Waadt	Echallens	Cugy (VD)	AFB	1	0
2003-07-30	Waadt	Echallens	Bretigny-sur-Morrens	AFB	1	0
2003-08-21	Waadt	Echallens	Oulens-sous-Echallens	Varroa destructor	1	0
2003-10-03	Waadt	Echallens	Villars-le-Terroir	AFB	1	0
2004-05-18	Waadt	Echallens	Villars-le-Terroir	AFB	1	0
2004-09-13	Waadt	Echallens	Saint-BarthÈlemy (VD)	AFB	1	0
2006-03-31	Waadt	Echallens	Villars-le-Terroir	Varroa destructor	1	0
2006-03-31	Waadt	Echallens	Villars-le-Terroir	Varroa destructor	1	0
2007-07-27	Waadt	Echallens	Saint-BarthÈlemy (VD)	AFB	1	0
2007-07-30	Waadt	Echallens	Saint-BarthÈlemy (VD)	AFB	1	0
2007-08-09	Waadt	Echallens	Dommartin (bis 2011)	AFB	1	0
2007-08-09	Waadt	Echallens	Dommartin (bis 2011)	AFB	1	0
2007-08-16	Waadt	Echallens	Poliez-le-Grand (bis 2011)	AFB	1	0
2007-08-28	Waadt	Echallens	Fey	Varroa destructor	1	0
2009-04-24	Waadt	Echallens	Essertines-sur-Yverdon	AFB	1	0
2010-04-21	Bern	Emmental	Lützelflüh	EFB	1	0
2010-04-26	Bern	Emmental	Sumiswald	EFB	1	0
2010-04-27	Bern	Emmental	Rüegsau	EFB	1	0
2010-05-20	Bern	Emmental	Röthenbach im Emmental	EFB	1	0
2010-06-07	Bern	Emmental	Sumiswald	EFB	1	0
2010-06-29	Bern	Emmental	Trachselwald	EFB	1	0
2010-06-30	Bern	Emmental	Lützelflüh	EFB	1	0
2010-07-07	Bern	Emmental	Krauchthal	EFB	1	0
2010-08-11	Bern	Emmental	Röthenbach im Emmental	EFB	1	0
2010-08-27	Bern	Emmental	Lützelflüh	EFB	1	0
2011-04-13	Bern	Emmental	Lützelflüh	EFB	1	0
2011-05-23	Bern	Emmental	Oberburg	EFB	1	0
2011-05-25	Bern	Emmental	Signau	EFB	1	0
2011-07-06	Bern	Emmental	Signau	EFB	1	0
2011-08-09	Bern	Emmental	Lützelflüh	EFB	1	0
2012-04-05	Bern	Emmental	Heimiswil	EFB	1	0
2012-04-13	Bern	Emmental	Oberburg	EFB	1	0
2012-05-02	Bern	Emmental	Signau	EFB	1	0
2012-05-03	Bern	Emmental	Eggiwil	EFB	1	0
2012-05-16	Bern	Emmental	Lyssach	EFB	1	0
2012-06-01	Bern	Emmental	Eggiwil	EFB	1	0
2012-06-02	Bern	Emmental	Oberburg	EFB	1	0
2012-06-05	Bern	Emmental	Lützelflüh	EFB	1	0
2012-06-05	Bern	Emmental	Sumiswald	EFB	1	0
2012-06-05	Bern	Emmental	Langnau im Emmental	EFB	1	0
2012-06-05	Bern	Emmental	Lützelflüh	EFB	1	0
2012-06-05	Bern	Emmental	Heimiswil	EFB	1	0
2012-06-07	Bern	Emmental	Rüderswil	EFB	1	0
2012-06-11	Bern	Emmental	Lützelflüh	EFB	1	0
2012-06-15	Bern	Emmental	Langnau im Emmental	EFB	1	0
2012-06-15	Bern	Emmental	Langnau im Emmental	EFB	1	0
2012-06-18	Bern	Emmental	Trachselwald	EFB	1	0
2012-06-19	Bern	Emmental	Eggiwil	EFB	1	0
2012-06-19	Bern	Emmental	Eggiwil	EFB	1	0
[truncated: 8,061 more rows]
